# Supplementary material for: QSAR Models for the Prediction of Dietary Biomagnification Factor in Fish
Source: MDPI journal article supplement (doi:10.3390/toxics11030209), 2023-02-23
Supplement: s1 [file s1]

# QSAR models for the prediction of dietary biomagnification factor in fish

Linda Bertato, Nicola Chirico and Ester Papa\*

Department of Theoretical and Applied Sciences, University of Insubria, Varese, Italy

## Supplementary materials

**Table S1** – Dataset 1: based on good quality data (high and medium). Chemicals are reported with CAS numbers, names, splitting category (Training or Prediction set), experimental and predicted Log BMF<sub>L</sub>, standardized residuals, HAT values and values of the molecular descriptors included in the model.

**Table S2** – Dataset 2: Dataset based only on low quality data with experimental Log BMF<sub>L</sub> (low) and predicted Log BMF<sub>L</sub> (by Equation 2).

**Table S3** – Dataset 3: Consistent dataset based on high quality data (Dataset 1) and verified low quality data from Dataset 2. Chemicals are reported with CAS numbers, names, splitting category (Training or Prediction set), experimental and predicted Log BMF<sub>L</sub>, standardized residuals, HAT values and values of the molecular descriptors included in the model.

**Table S4** - List of the excluded molecules.

**Table S5** – List of the molecules outside the Applicability Domain (AD) of equations 1 and 3. with CAS numbers, SMILES, Structures, chemicals common names, and information on the AD.

**Table S1** – Dataset 1: based on good quality data (high and medium). Chemicals are reported with CAS numbers, names, splitting category (Training or Prediction set), experimental and predicted Log BMFL, standardized residuals, HAT values and values of the molecular descriptors included in the model.

| CAS         | Chemical Name                     | Split Eq. 1 | Exp Log BMFL<br>highQuality | Pred Log BMFL | Pred. Mod. Eq. Res. | Std.Pred. Mod. Eq. Res. | HAT i/i (h*=0.209) | AATS5i  | BCUT w-1l | Pubchem FP257 | C3SP 2 | MAT S1i | GATS 5m | GGI5  |
|-------------|-----------------------------------|-------------|-----------------------------|---------------|---------------------|-------------------------|--------------------|---------|-----------|---------------|--------|---------|---------|-------|
| 10394-57-7  | 9-n butylphenanthrene             | Training    | -1.854                      | -1.174        | 0.680               | 1.610                   | 0.022              | 152.312 | 11.890    | 1             | 5      | 0.053   | 1.095   | 0.389 |
| 104-72-3    | Decyl benzene                     | Prediction  | -0.745                      | -0.776        | -0.031              | -0.073                  | 0.026              | 163.684 | 11.890    | 0             | 1      | 0.000   | 0.935   | 0.090 |
| 107534-96-3 | Tebuconazole                      | Training    | -1.921                      | -1.923        | -0.002              | -0.005                  | 0.136              | 169.903 | 11.890    | 1             | 1      | -0.078  | 0.494   | 0.893 |
| 111-84-2    | n-nonane                          | Training    | -0.893                      | -1.195        | -0.302              | -0.722                  | 0.038              | 167.659 | 11.890    | 0             | 0      | -0.079  | 0.919   | 0.056 |
| 112281-77-3 | Tetraconazole                     | Prediction  | -2.046                      | -1.411        | 0.634               | 1.635                   | 0.173              | 170.118 | 11.988    | 1             | 1      | -0.118  | 1.037   | 0.847 |
| 112-40-3    | n-dodecane                        | Prediction  | -0.878                      | -1.056        | -0.179              | -0.425                  | 0.031              | 166.549 | 11.890    | 0             | 0      | -0.059  | 0.946   | 0.056 |
| 112-41-4    | 1-dodecene                        | Training    | -0.941                      | -0.996        | -0.055              | -0.131                  | 0.031              | 165.927 | 11.890    | 0             | 0      | -0.057  | 0.933   | 0.056 |
| 118-74-1    | Hexachlorobenzene                 | Training    | 0.306                       | 0.549         | 0.243               | 0.678                   | 0.293              | 168.159 | 11.999    | 0             | 0      | 0.000   | 0.000   | 0.000 |
| 118-82-1    | Binox M                           | Prediction  | 0.155                       | -1.265        | -1.420              | -4.417                  | 0.433              | 157.787 | 11.890    | 1             | 6      | 0.064   | 1.427   | 2.542 |
| 120068-37-3 | Fipronil                          | Training    | -1.699                      | -1.697        | 0.002               | 0.007                   | 0.412              | 180.878 | 11.999    | 1             | 1      | -0.016  | 1.159   | 1.567 |
| 120-12-7    | Anthracene                        | Training    | -1.875                      | -1.651        | 0.224               | 0.538                   | 0.049              | 155.231 | 11.850    | 1             | 4      | 0.055   | 0.962   | 0.111 |
| 123-48-8    | 2,2,4,4,6,6 pentamethyl-3-heptene | Prediction  | -1.284                      | -0.390        | 0.894               | 2.446                   | 0.267              | 150.833 | 11.890    | 0             | 1      | -0.057  | 1.997   | 0.500 |
| 125116-23-6 | Metconazole                       | Training    | -1.721                      | -1.726        | -0.005              | -0.012                  | 0.126              | 169.212 | 11.890    | 1             | 1      | -0.034  | 0.467   | 0.858 |
| 126690-66-2 | 2,4,6 Trimethyl-3-heptene         | Prediction  | -1.041                      | -0.769        | 0.272               | 0.688                   | 0.143              | 156.295 | 11.890    | 0             | 1      | -0.069  | 1.679   | 0.222 |
| 13029-08-8  | 2,2'-Dichlorophenyl               | Prediction  | 0.663                       | 0.097         | -0.566              | -1.369                  | 0.062              | 152.071 | 11.999    | 1             | 2      | 0.035   | 1.340   | 0.194 |
| 13150-81-7  | 2,6-Dimethyldecane                | Training    | -1.319                      | -0.993        | 0.326               | 0.774                   | 0.028              | 166.327 | 11.890    | 0             | 0      | -0.059  | 0.951   | 0.222 |

|                   |                                                     |            |        |        |        |        |       |         |        |   |   |            |       |       |
|-------------------|-----------------------------------------------------|------------|--------|--------|--------|--------|-------|---------|--------|---|---|------------|-------|-------|
| <b>13151-34-3</b> | 3-methyl decane                                     | Prediction | -1.699 | -1.179 | 0.520  | 1.238  | 0.033 | 168.836 | 11.890 | 0 | 0 | -<br>0.064 | 0.835 | 0.111 |
| <b>13475-82-6</b> | 2,2,4,6,6-pentamethylheptane                        | Training   | -0.728 | -0.608 | 0.120  | 0.304  | 0.143 | 157.726 | 11.890 | 0 | 0 | -<br>0.059 | 1.652 | 0.500 |
| <b>14233-37-5</b> | 9,10-Anthracenedione, 1,4-bis[(1-methylethyl)amino] | Training   | -0.500 | -0.857 | -0.357 | -0.883 | 0.103 | 152.222 | 11.890 | 1 | 4 | 0.017      | 1.124 | 1.389 |
| <b>15254-25-8</b> | 2,3,6,7-Tetramethylanthracene                       | Training   | -1.757 | -2.096 | -0.339 | -0.838 | 0.102 | 160.517 | 11.890 | 1 | 8 | 0.053      | 0.819 | 0.444 |
| <b>15968-05-5</b> | 2,2',6,6'-Tetrachlorobiphenyl                       | Training   | 0.623  | 0.420  | -0.203 | -0.488 | 0.046 | 149.757 | 11.999 | 1 | 2 | 0.035      | 1.106 | 0.250 |
| <b>1610-22-6</b>  | 1,2,3,4,4a,7,8,9,10,11,12,12a-dodecahydrochrysene   | Training   | -0.770 | -0.496 | 0.273  | 0.663  | 0.068 | 159.450 | 11.900 | 0 | 4 | 0.089      | 1.072 | 0.361 |
| <b>16435-49-7</b> | 2-methyl-1-dodecene                                 | Prediction | -1.200 | -1.102 | 0.099  | 0.234  | 0.029 | 165.756 | 11.890 | 0 | 1 | -<br>0.053 | 0.940 | 0.111 |
| <b>16606-02-3</b> | 2,4',5-Trichlorobiphenyl                            | Training   | 0.525  | 0.404  | -0.121 | -0.291 | 0.049 | 152.367 | 11.999 | 1 | 2 | 0.035      | 0.829 | 0.389 |
| <b>1678-98-4</b>  | iso-butyl cyclohexane                               | Training   | -0.652 | -0.695 | -0.044 | -0.104 | 0.024 | 165.164 | 11.900 | 0 | 0 | 0.000      | 1.036 | 0.118 |
| <b>16958-92-2</b> | Diisotridecyl adipate                               | Training   | -1.959 | -1.017 | 0.942  | 2.251  | 0.040 | 165.093 | 11.890 | 0 | 0 | -<br>0.085 | 1.023 | 0.222 |
| <b>1705-85-7</b>  | 6-methylchrysene                                    | Training   | -1.398 | -1.251 | 0.148  | 0.353  | 0.039 | 150.424 | 11.890 | 1 | 7 | 0.061      | 1.148 | 0.618 |
| <b>1706-50-9</b>  | 1,1':3',1''Tercyclohexane                           | Training   | -0.357 | -0.223 | 0.134  | 0.323  | 0.062 | 163.993 | 11.900 | 0 | 0 | 0.068      | 0.937 | 0.500 |
| <b>17088-22-1</b> | 1-ethylpyrene                                       | Training   | -1.699 | -1.424 | 0.275  | 0.657  | 0.040 | 152.141 | 11.890 | 1 | 7 | 0.067      | 1.162 | 0.458 |
| <b>17301-23-4</b> | 2,6-Dimethyl undecane                               | Training   | -1.027 | -0.950 | 0.077  | 0.183  | 0.028 | 166.145 | 11.890 | 0 | 0 | -<br>0.054 | 0.956 | 0.278 |
| <b>17312-44-6</b> | 2,3 Dimethyldecane                                  | Prediction | -1.585 | -1.196 | 0.389  | 0.928  | 0.034 | 169.888 | 11.890 | 0 | 0 | -<br>0.059 | 0.774 | 0.167 |
| <b>1732-13-4</b>  | 1,2,3,6,7,8 Hexahydropyrene                         | Training   | -1.252 | -1.471 | -0.219 | -0.527 | 0.051 | 154.831 | 11.900 | 1 | 6 | 0.086      | 1.229 | 0.111 |
| <b>1795-15-9</b>  | n - Octyl Cyclohexane                               | Training   | -1.222 | -0.752 | 0.470  | 1.114  | 0.025 | 166.787 | 11.900 | 0 | 0 | 0.000      | 0.887 | 0.090 |

|                    |                                                        |            |        |        |        |        |       |         |        |   |    |            |       |       |
|--------------------|--------------------------------------------------------|------------|--------|--------|--------|--------|-------|---------|--------|---|----|------------|-------|-------|
| <b>18094-01-4</b>  | 2 methyl 1-Tridecene                                   | Prediction | -0.921 | -1.081 | -0.160 | -0.381 | 0.028 | 165.618 | 11.890 | 0 | 1  | -<br>0.049 | 0.945 | 0.111 |
| <b>1836-75-5</b>   | 2,4-Dichloro-1-(4-nitrophenoxy) benzene                | Training   | -0.821 | -0.485 | 0.336  | 0.910  | 0.254 | 154.242 | 11.850 | 1 | 0  | 0.168      | 0.854 | 0.417 |
| <b>1839-63-0</b>   | 1,3,5-Trimethyl cyclohexane                            | Training   | -0.456 | -0.954 | -0.498 | -1.192 | 0.044 | 166.510 | 11.900 | 0 | 0  | 0.000      | 1.254 | 0.000 |
| <b>18516-37-5</b>  | 2-methyl-1-undecene                                    | Training   | -1.456 | -1.126 | 0.330  | 0.785  | 0.031 | 165.927 | 11.890 | 0 | 1  | -<br>0.057 | 0.933 | 0.111 |
| <b>1889-67-4</b>   | Benzene, 1,1'-(1,1,2,2-tetramethyl-1,2-ethaneDiyl)bis- | Training   | -0.777 | -1.424 | -0.646 | -1.553 | 0.050 | 162.220 | 11.890 | 1 | 2  | 0.030      | 0.911 | 0.625 |
| <b>191-24-2</b>    | Benzo(ghi)perylene                                     | Training   | -1.495 | -1.618 | -0.123 | -0.305 | 0.111 | 145.804 | 11.850 | 1 | 10 | 0.070      | 1.085 | 0.736 |
| <b>193-39-5</b>    | Indeno 1,2,3-cd pyrene                                 | Training   | -1.538 | -1.634 | -0.096 | -0.239 | 0.112 | 146.060 | 11.850 | 1 | 10 | 0.070      | 1.124 | 0.820 |
| <b>194-69-4</b>    | Benzo(c)chrysene                                       | Training   | -1.301 | -1.600 | -0.299 | -0.723 | 0.061 | 148.346 | 11.850 | 1 | 8  | 0.064      | 1.079 | 0.542 |
| <b>19780-74-6</b>  | 5-ethyl-1-nonene                                       | Training   | -0.461 | -0.984 | -0.523 | -1.244 | 0.030 | 166.134 | 11.890 | 0 | 0  | -<br>0.063 | 0.909 | 0.167 |
| <b>20279-21-4</b>  | 1,2,3,10b-Tetrahydrofluorant hene                      | Training   | -1.638 | -1.252 | 0.386  | 0.920  | 0.033 | 154.143 | 11.900 | 1 | 5  | 0.080      | 1.217 | 0.219 |
| <b>204256-07-5</b> | 2,3 Dimethyl-5(4methylpentyl) naphthalene              | Training   | -1.367 | -1.748 | -0.381 | -0.909 | 0.034 | 160.151 | 11.890 | 1 | 5  | 0.031      | 0.951 | 0.514 |
| <b>2050-68-2</b>   | 4,4'-Dichlorobiphenyl                                  | Training   | 0.519  | 0.460  | -0.058 | -0.144 | 0.110 | 153.991 | 11.999 | 1 | 2  | 0.035      | 0.471 | 0.361 |
| <b>2051-30-1</b>   | 2,6-Dimethyl octane                                    | Prediction | -1.854 | -1.201 | 0.652  | 1.555  | 0.034 | 169.400 | 11.890 | 0 | 0  | -<br>0.071 | 0.814 | 0.222 |
| <b>206-44-0</b>    | Fluoranthene                                           | Training   | -1.553 | -1.585 | -0.032 | -0.077 | 0.057 | 149.167 | 11.850 | 1 | 6  | 0.065      | 1.303 | 0.219 |
| <b>207-08-9</b>    | Benzo(k)fluoranthene                                   | Prediction | -1.979 | -1.614 | 0.365  | 0.881  | 0.060 | 148.762 | 11.850 | 1 | 8  | 0.067      | 1.091 | 0.594 |
| <b>214-17-5</b>    | Benzo[b]chrysene                                       | Training   | -1.745 | -1.721 | 0.023  | 0.056  | 0.058 | 150.131 | 11.850 | 1 | 8  | 0.064      | 1.034 | 0.528 |
| <b>217-59-4</b>    | Triphenylene                                           | Training   | -1.658 | -1.311 | 0.346  | 0.835  | 0.056 | 146.996 | 11.850 | 1 | 6  | 0.061      | 1.175 | 0.375 |
| <b>218-01-9</b>    | Chrysene                                               | Prediction | -1.538 | -1.598 | -0.061 | -0.145 | 0.041 | 150.909 | 11.850 | 1 | 6  | 0.061      | 1.125 | 0.361 |
| <b>2189-60-8</b>   | n-octyl benzene                                        | Prediction | -1.648 | -0.759 | 0.888  | 2.109  | 0.026 | 163.529 | 11.890 | 0 | 1  | 0.000      | 0.927 | 0.090 |
| <b>22907-72-8</b>  | 1,4 Diisopropyl cyclohexane                            | Prediction | -0.479 | -1.009 | -0.530 | -1.262 | 0.032 | 170.097 | 11.890 | 0 | 0  | 0.000      | 0.844 | 0.361 |

|                   |                                                                                 |            |        |        |        |        |       |         |        |   |   |            |       |       |
|-------------------|---------------------------------------------------------------------------------|------------|--------|--------|--------|--------|-------|---------|--------|---|---|------------|-------|-------|
| <b>23342-25-8</b> | 2,2,5,7-Tetramethyltetralin                                                     | Prediction | -1.301 | -0.796 | 0.505  | 1.220  | 0.060 | 159.824 | 11.890 | 0 | 4 | 0.041      | 1.207 | 0.535 |
| <b>243-17-4</b>   | Benzo(b)fluorene                                                                | Training   | -1.602 | -1.197 | 0.405  | 0.963  | 0.028 | 153.527 | 11.900 | 1 | 6 | 0.066      | 0.978 | 0.445 |
| <b>2435-85-0</b>  | Hexadecahydropyr                                                                | Training   | 0.009  | -0.295 | -0.304 | -0.738 | 0.071 | 164.555 | 11.900 | 0 | 0 | 0.108      | 1.010 | 0.111 |
| <b>2437-56-1</b>  | ene<br>1-Tridecene                                                              | Training   | -0.963 | -0.972 | -0.009 | -0.022 | 0.030 | 165.756 | 11.890 | 0 | 0 | -<br>0.053 | 0.940 | 0.056 |
| <b>2541-69-7</b>  | 7-Methylbenz(a)anthracene                                                       | Training   | -2.097 | -1.364 | 0.733  | 1.750  | 0.038 | 151.919 | 11.890 | 1 | 7 | 0.061      | 1.121 | 0.583 |
| <b>25569-80-6</b> | 2,3'-Dichlorobiphenyl                                                           | Training   | 0.267  | 0.099  | -0.169 | -0.406 | 0.055 | 152.564 | 11.999 | 1 | 2 | 0.035      | 1.340 | 0.333 |
| <b>26186-00-5</b> | 1-Heptadecyne                                                                   | Training   | -0.086 | -0.863 | -0.777 | -1.847 | 0.029 | 164.854 | 11.890 | 0 | 0 | -<br>0.039 | 0.948 | 0.056 |
| <b>2732-58-3</b>  | 6-ethylchrysene                                                                 | Prediction | -1.495 | -1.200 | 0.295  | 0.705  | 0.041 | 150.325 | 11.890 | 1 | 7 | 0.062      | 1.119 | 0.708 |
| <b>2974-92-7</b>  | 3,4-Dichlorobiphenyl                                                            | Training   | 0.477  | 0.362  | -0.115 | -0.277 | 0.061 | 153.530 | 11.999 | 1 | 2 | 0.035      | 0.722 | 0.361 |
| <b>2980-71-4</b>  | 2-methyl-1-nonene                                                               | Prediction | -1.367 | -1.194 | 0.173  | 0.413  | 0.035 | 166.432 | 11.890 | 0 | 1 | -<br>0.069 | 0.916 | 0.111 |
| <b>3074-71-3</b>  | 2,3-Dimethylheptane                                                             | Prediction | -0.792 | -1.397 | -0.605 | -1.454 | 0.050 | 171.973 | 11.890 | 0 | 0 | -<br>0.079 | 0.689 | 0.111 |
| <b>319-84-6</b>   | (1 alpha,2 alpha,3 beta,4 alpha,5 beta,6 beta)1,2,3,4,5,6-Hexachlorocyclohexane | Training   | -1.516 | -0.834 | 0.682  | 1.789  | 0.203 | 176.439 | 11.999 | 0 | 0 | 0.000      | 1.358 | 0.000 |
| <b>32774-16-6</b> | 3,3',4,4',5,5'-Hexachlorobiphenyl                                               | Training   | 0.496  | 0.434  | -0.061 | -0.146 | 0.036 | 151.311 | 11.999 | 1 | 2 | 0.035      | 1.031 | 0.583 |
| <b>33025-41-1</b> | 2,3,4,4'-Tetrachlorobiphenyl                                                    | Training   | 0.688  | 0.353  | -0.335 | -0.799 | 0.035 | 152.146 | 11.999 | 1 | 2 | 0.035      | 1.015 | 0.500 |
| <b>3321-50-4</b>  | Cyclohexane, 1,1'-(1,2-EthaneDiyl)Bis-                                          | Training   | -1.301 | -0.581 | 0.721  | 1.726  | 0.044 | 167.485 | 11.900 | 0 | 0 | 0.045      | 0.779 | 0.181 |
| <b>33460-02-5</b> | 3 Phenylbicyclohexyl                                                            | Training   | -1.046 | -1.102 | -0.056 | -0.133 | 0.029 | 165.756 | 11.890 | 0 | 1 | -<br>0.053 | 0.940 | 0.111 |
| <b>34883-43-7</b> | 2,4'-Dichlorobiphenyl                                                           | Training   | 0.574  | 0.180  | -0.394 | -0.942 | 0.041 | 153.025 | 11.999 | 1 | 2 | 0.035      | 1.090 | 0.278 |

|                   |                                                                     |            |        |        |        |        |       |         |        |   |   |        |       |       |
|-------------------|---------------------------------------------------------------------|------------|--------|--------|--------|--------|-------|---------|--------|---|---|--------|-------|-------|
| <b>35065-27-1</b> | 2,2',4,4',5,5'-Hexachlorobiphenyl                                   | Training   | 0.614  | 0.661  | 0.047  | 0.114  | 0.058 | 150.336 | 11.999 | 1 | 2 | 0.035  | 0.813 | 0.694 |
| <b>37680-65-2</b> | 2,2',5-Trichlorobiphenyl                                            | Training   | 0.580  | 0.364  | -0.216 | -0.516 | 0.039 | 151.413 | 11.999 | 1 | 2 | 0.035  | 1.029 | 0.361 |
| <b>38380-01-7</b> | 2,2',4,4',5-Pentachlorobiphenyl                                     | Prediction | 0.868  | 0.535  | -0.333 | -0.799 | 0.045 | 150.995 | 11.999 | 1 | 2 | 0.035  | 0.891 | 0.583 |
| <b>38444-73-4</b> | 2,2',6-Trichlorobiphenyl                                            | Prediction | 0.568  | 0.205  | -0.363 | -0.876 | 0.058 | 150.908 | 11.999 | 1 | 2 | 0.035  | 1.323 | 0.222 |
| <b>38444-77-8</b> | 2,4',6-Trichlorobiphenyl                                            | Training   | 0.580  | 0.105  | -0.475 | -1.151 | 0.066 | 151.851 | 11.999 | 1 | 2 | 0.035  | 1.417 | 0.306 |
| <b>38444-78-9</b> | 2,2',3-Trichlorobiphenyl                                            | Prediction | 0.477  | 0.207  | -0.270 | -0.650 | 0.051 | 151.401 | 11.999 | 1 | 2 | 0.035  | 1.323 | 0.361 |
| <b>38444-85-8</b> | 2,3,4'-Trichlorobiphenyl                                            | Prediction | 0.352  | 0.247  | -0.105 | -0.251 | 0.037 | 152.355 | 11.999 | 1 | 2 | 0.035  | 1.123 | 0.389 |
| <b>38444-86-9</b> | 2,3',4'-Trichlorobiphenyl                                           | Prediction | 0.519  | 0.263  | -0.255 | -0.609 | 0.036 | 152.355 | 11.999 | 1 | 2 | 0.035  | 1.123 | 0.444 |
| <b>3891-98-3</b>  | 2,6,10-Trimethyl dodecane                                           | Training   | -0.002 | -0.946 | -0.944 | -2.244 | 0.028 | 167.226 | 11.890 | 0 | 0 | -0.046 | 0.894 | 0.389 |
| <b>40458-98-8</b> | 2,7-Diisopropyl naphthalene                                         | Training   | -1.438 | -1.594 | -0.156 | -0.372 | 0.031 | 160.496 | 11.890 | 1 | 4 | 0.034  | 0.940 | 0.583 |
| <b>41411-64-7</b> | 2,3,3',4,4',5,6-Heptachlorobiphenyl                                 | Training   | 0.894  | 0.527  | -0.367 | -0.878 | 0.044 | 149.655 | 11.999 | 1 | 2 | 0.035  | 1.194 | 0.750 |
| <b>41464-39-5</b> | 2,2',3,5'-Tetrachlorobiphenyl                                       | Training   | 0.789  | 0.407  | -0.382 | -0.912 | 0.037 | 150.743 | 11.999 | 1 | 2 | 0.035  | 1.106 | 0.472 |
| <b>41464-49-7</b> | 2,3,3',5'-Tetrachlorobiphenyl                                       | Prediction | 0.238  | 0.241  | 0.003  | 0.007  | 0.052 | 151.224 | 11.999 | 1 | 2 | 0.035  | 1.360 | 0.500 |
| <b>4175-54-6</b>  | 1,2,3,4-Tetrahydro-1,4-Dimethyl naphthalene (1,4-Dimethyl Tetralin) | Training   | -0.801 | -0.831 | -0.029 | -0.070 | 0.031 | 163.515 | 11.890 | 0 | 2 | 0.046  | 1.079 | 0.125 |
| <b>4292-75-5</b>  | n-hexyl cyclohexane                                                 | Training   | -1.377 | -0.783 | 0.594  | 1.409  | 0.026 | 167.334 | 11.900 | 0 | 0 | 0.000  | 0.864 | 0.090 |
| <b>43121-43-3</b> | Triadimefon                                                         | Prediction | -1.921 | -2.023 | -0.102 | -0.266 | 0.188 | 167.398 | 11.890 | 1 | 0 | -0.183 | 0.697 | 0.871 |
| <b>4316-65-8</b>  | 3,5,5' Trimethyl hexene                                             | Training   | -1.201 | -1.019 | 0.181  | 0.439  | 0.065 | 162.847 | 11.890 | 0 | 0 | -0.077 | 1.284 | 0.000 |

|            |                                       |            |        |        |        |        |       |         |        |   |   |        |       |       |
|------------|---------------------------------------|------------|--------|--------|--------|--------|-------|---------|--------|---|---|--------|-------|-------|
| 438-22-2   | 5 $\alpha$ (H)-androstane             | Prediction | -0.172 | -0.245 | -0.073 | -0.178 | 0.090 | 165.899 | 11.900 | 0 | 0 | 0.094  | 0.935 | 0.667 |
| 4390-04-9  | 2,2,4,4,6,8,8-heptamethyl nonane      | Prediction | 0.004  | -0.340 | -0.344 | -0.910 | 0.216 | 154.865 | 11.890 | 0 | 0 | -0.043 | 1.814 | 0.778 |
| 475-03-6   | 1,1,6 Trimethyl Tetralin              | Training   | -0.484 | -0.858 | -0.374 | -0.894 | 0.039 | 162.053 | 11.890 | 0 | 3 | 0.043  | 1.163 | 0.319 |
| 488-23-3   | 1,2,3,4 Tetramethyl benzene           | Training   | -1.292 | -1.774 | -0.481 | -1.189 | 0.100 | 171.512 | 11.890 | 0 | 4 | 0.000  | 0.777 | 0.000 |
| 4920-95-0  | 3,3',4,4' Tetramethyl 1,1'-biphenyl   | Training   | -2.046 | -2.069 | -0.023 | -0.057 | 0.080 | 164.109 | 11.890 | 1 | 6 | 0.032  | 0.708 | 0.528 |
| 496-10-6   | Bicyclo[4.3.0]nonane                  | Training   | -1.102 | -1.056 | 0.047  | 0.114  | 0.079 | 174.319 | 11.900 | 0 | 0 | 0.068  | 0.694 | 0.000 |
| 50-32-8    | Benzo[a]pyrene                        | Training   | -1.745 | -1.657 | 0.088  | 0.212  | 0.062 | 148.080 | 11.850 | 1 | 8 | 0.067  | 1.151 | 0.375 |
| 50876-32-9 | cis 1,1,3,5 Tetramethyl cyclohexane   | Training   | -0.265 | -0.801 | -0.536 | -1.310 | 0.082 | 162.838 | 11.900 | 0 | 0 | 0.000  | 1.510 | 0.000 |
| 51655-65-3 | 2-butyl-1-decene                      | Prediction | -0.975 | -1.037 | -0.063 | -0.149 | 0.029 | 164.953 | 11.890 | 0 | 1 | -0.049 | 0.961 | 0.111 |
| 52663-59-9 | 2,2',3,4-Tetrachlorobiphenyl          | Training   | 0.218  | 0.328  | 0.111  | 0.264  | 0.038 | 151.192 | 11.999 | 1 | 2 | 0.035  | 1.187 | 0.472 |
| 526-73-8   | 1,3,5-Trimethylbenzene                | Training   | -1.602 | -1.720 | -0.118 | -0.288 | 0.084 | 172.994 | 11.890 | 0 | 3 | 0.000  | 0.729 | 0.000 |
| 52886-35-8 | 3-methyl-1-hexyl cyclohexane          | Training   | -1.181 | -0.739 | 0.441  | 1.046  | 0.023 | 166.495 | 11.900 | 0 | 0 | 0.000  | 0.936 | 0.146 |
| 5325-97-3  | 1,2,3,4,5,6,7,8-octahydrophenanthrene | Training   | -0.893 | -0.633 | 0.260  | 0.629  | 0.062 | 159.370 | 11.900 | 0 | 4 | 0.076  | 1.132 | 0.125 |
| 53-70-3    | Dibenzo[a,h]anthracene                | Training   | -2.155 | -1.721 | 0.434  | 1.046  | 0.058 | 150.131 | 11.850 | 1 | 8 | 0.064  | 1.034 | 0.528 |
| 541-02-6   | Decamethylcyclotetrasiloxane          | Training   | 0.532  | 1.007  | 0.475  | 1.380  | 0.350 | 155.496 | 11.998 | 0 | 0 | -0.178 | 1.027 | 1.944 |
| 556-67-2   | Octamethylcyclotetrasiloxane          | Training   | 0.602  | 0.374  | -0.228 | -0.584 | 0.160 | 160.019 | 11.998 | 0 | 0 | -0.178 | 0.994 | 0.944 |
| 55702-45-9 | 2,3,6-Trichlorobiphenyl               | Training   | 0.470  | 0.191  | -0.279 | -0.672 | 0.054 | 151.401 | 11.999 | 1 | 2 | 0.035  | 1.323 | 0.306 |
| 55712-37-3 | 2,3',4-Trichlorobiphenyl              | Training   | 0.556  | 0.263  | -0.293 | -0.699 | 0.036 | 152.355 | 11.999 | 1 | 2 | 0.035  | 1.123 | 0.444 |
| 5617-41-4  | n-heptyl cyclohexane                  | Training   | -1.699 | -0.766 | 0.933  | 2.214  | 0.026 | 167.033 | 11.900 | 0 | 0 | 0.000  | 0.877 | 0.090 |

|                   |                                                      |            |        |        |        |        |       |         |        |   |   |        |       |       |
|-------------------|------------------------------------------------------|------------|--------|--------|--------|--------|-------|---------|--------|---|---|--------|-------|-------|
| <b>56-49-5</b>    | 3-methylcholanthrene                                 | Training   | -1.523 | -1.700 | -0.177 | -0.433 | 0.086 | 152.912 | 11.890 | 1 | 9 | 0.074  | 1.141 | 0.601 |
| <b>56558-16-8</b> | 2,2',4,6,6'-Pentachlorobiphenyl                      | Training   | 0.393  | 0.500  | 0.107  | 0.257  | 0.043 | 149.548 | 11.999 | 1 | 2 | 0.035  | 1.048 | 0.361 |
| <b>5707-44-8</b>  | 4-ethyl-1,1'-biphenyl                                | Prediction | -1.745 | -1.390 | 0.354  | 0.843  | 0.029 | 158.741 | 11.890 | 1 | 3 | 0.034  | 0.947 | 0.313 |
| <b>57465-28-8</b> | 3,3',4,4',5-Pentachlorobiphenyl                      | Prediction | 0.581  | 0.457  | -0.124 | -0.297 | 0.042 | 151.981 | 11.999 | 1 | 2 | 0.035  | 0.891 | 0.583 |
| <b>581-40-8</b>   | 2,3-Dimethylnaphthalene                              | Training   | -1.921 | -1.894 | 0.027  | 0.066  | 0.054 | 163.525 | 11.890 | 1 | 4 | 0.040  | 0.861 | 0.167 |
| <b>608-93-5</b>   | Pentachlorobenzene                                   | Prediction | -0.387 | -0.272 | 0.115  | 0.286  | 0.107 | 170.886 | 11.999 | 0 | 0 | 0.000  | 1.128 | 0.000 |
| <b>6117-97-1</b>  | 4-methyl dodecane                                    | Training   | -1.114 | -1.019 | 0.095  | 0.225  | 0.029 | 166.090 | 11.890 | 0 | 0 | -0.054 | 1.001 | 0.111 |
| <b>62338-09-4</b> | 2,2,3-Trimethyl decane                               | Training   | -1.181 | -1.200 | -0.019 | -0.046 | 0.036 | 170.617 | 11.890 | 0 | 0 | -0.054 | 0.732 | 0.222 |
| <b>629-50-5</b>   | n-Tridecane                                          | Training   | -0.569 | -1.027 | -0.458 | -1.090 | 0.030 | 166.327 | 11.890 | 0 | 0 | -0.054 | 0.951 | 0.056 |
| <b>629-59-4</b>   | n-Tetradecane                                        | Training   | 0.029  | -1.002 | -1.032 | -2.453 | 0.029 | 166.145 | 11.890 | 0 | 0 | -0.050 | 0.956 | 0.056 |
| <b>629-73-2</b>   | 1-Hexadecene                                         | Training   | 0.183  | -0.920 | -1.103 | -2.621 | 0.029 | 165.408 | 11.890 | 0 | 0 | -0.043 | 0.953 | 0.056 |
| <b>66246-88-6</b> | 1H-1,2,4-Triazole, 1-[2-(2,4-Dichlorophenyl)pentyl]- | Training   | -2.000 | -1.794 | 0.206  | 0.512  | 0.109 | 162.141 | 11.890 | 1 | 1 | -0.124 | 0.951 | 0.569 |
| <b>68194-04-7</b> | 2,2',4,6'-Tetrachlorobiphenyl                        | Training   | -0.854 | 0.326  | 1.180  | 2.825  | 0.043 | 150.699 | 11.999 | 1 | 2 | 0.035  | 1.187 | 0.333 |
| <b>68194-05-8</b> | 2,2',3,4',6-Pentachlorobiphenyl                      | Training   | 0.303  | 0.502  | 0.198  | 0.474  | 0.039 | 150.041 | 11.999 | 1 | 2 | 0.035  | 1.048 | 0.500 |
| <b>68194-15-0</b> | 2,2',3,4,5,6'-Hexachlorobiphenyl                     | Prediction | -0.523 | 0.565  | 1.088  | 2.608  | 0.045 | 149.371 | 11.999 | 1 | 2 | 0.035  | 1.180 | 0.778 |
| <b>68194-16-1</b> | 2,2',3,3',4,5,6-Heptachlorobiphenyl                  | Training   | 0.009  | 0.647  | 0.638  | 1.531  | 0.047 | 148.712 | 11.999 | 1 | 2 | 0.035  | 1.125 | 0.778 |



|                   |                                                             |            |        |        |        |        |       |         |        |   |   |            |       |       |
|-------------------|-------------------------------------------------------------|------------|--------|--------|--------|--------|-------|---------|--------|---|---|------------|-------|-------|
| <b>6975-98-0</b>  | 2-methyl decane                                             | Training   | -1.444 | -1.076 | 0.368  | 0.875  | 0.031 | 166.826 | 11.890 | 0 | 0 | -<br>0.064 | 0.939 | 0.111 |
| <b>702-79-4</b>   | 1,3-Dimethyladamantane                                      | Training   | -1.174 | -0.491 | 0.683  | 1.674  | 0.087 | 163.721 | 11.900 | 0 | 0 | 0.098      | 1.378 | 0.000 |
| <b>70356-09-1</b> | 1-(4-tert-butylphenyl)-3-(4-methoxyphenyl)propane-1,3-Dione | Training   | -0.914 | -1.508 | -0.593 | -1.439 | 0.067 | 161.118 | 11.890 | 1 | 3 | -<br>0.022 | 0.889 | 1.056 |
| <b>7045-71-8</b>  | 2-methyl undecane                                           | Training   | -1.292 | -1.040 | 0.252  | 0.600  | 0.030 | 166.549 | 11.890 | 0 | 0 | -<br>0.059 | 0.946 | 0.111 |
| <b>7116-96-3</b>  | 4-pentyl-1,1'-Biphenyl                                      | Prediction | -1.174 | -1.379 | -0.205 | -0.487 | 0.029 | 158.588 | 11.890 | 1 | 3 | 0.031      | 0.942 | 0.340 |
| <b>71608-00-9</b> | 1-octylpyrene                                               | Prediction | -1.108 | -1.643 | -0.535 | -1.283 | 0.044 | 155.729 | 11.890 | 1 | 7 | 0.061      | 1.026 | 0.486 |
| <b>717-74-8</b>   | Benzene, 1,3,5-Tris(1-methylethyl)-                         | Training   | -0.398 | -0.492 | -0.094 | -0.233 | 0.097 | 159.698 | 11.890 | 0 | 3 | 0.000      | 0.969 | 1.042 |
| <b>72-43-5</b>    | Methoxy chlor                                               | Training   | -0.969 | -0.703 | 0.266  | 0.668  | 0.126 | 158.028 | 11.996 | 1 | 2 | -<br>0.092 | 1.415 | 0.653 |
| <b>73575-52-7</b> | 2,3',4,5'-Tetrachlorobiphenyl                               | Training   | 0.218  | 0.330  | 0.112  | 0.268  | 0.038 | 151.685 | 11.999 | 1 | 2 | 0.035      | 1.187 | 0.611 |
| <b>74472-36-9</b> | 2,3,3',5,6-Pentachlorobiphenyl                              | Training   | 0.477  | 0.423  | -0.054 | -0.130 | 0.040 | 150.072 | 11.999 | 1 | 2 | 0.035      | 1.205 | 0.528 |
| <b>74472-38-1</b> | 2,3,4,4',6-Pentachlorobiphenyl                              | Training   | 0.857  | 0.396  | -0.461 | -1.100 | 0.036 | 150.983 | 11.999 | 1 | 2 | 0.035      | 1.122 | 0.528 |
| <b>74472-48-3</b> | 2,2',3,4,4',6,6'-Heptachlorobiphenyl                        | Training   | 0.928  | 0.703  | -0.225 | -0.541 | 0.049 | 148.681 | 11.999 | 1 | 2 | 0.035      | 0.980 | 0.694 |
| <b>74487-85-7</b> | 2,2',3,4',5,6,6'-Heptachlorobiphenyl                        | Training   | 0.884  | 0.807  | -0.076 | -0.184 | 0.061 | 148.231 | 11.999 | 1 | 2 | 0.035      | 0.912 | 0.806 |
| <b>781-17-9</b>   | 4,5,9,10-Tetrahydropyrene                                   | Training   | -1.553 | -1.486 | 0.067  | 0.162  | 0.050 | 154.874 | 11.900 | 1 | 6 | 0.080      | 1.214 | 0.111 |
| <b>81-15-2</b>    | Musk-xylene                                                 | Training   | -0.210 | -0.392 | -0.182 | -0.600 | 0.495 | 169.015 | 11.890 | 0 | 3 | 0.278      | 1.353 | 1.618 |
| <b>821-95-4</b>   | 1-undecene                                                  | Prediction | -1.409 | -1.026 | 0.383  | 0.912  | 0.033 | 166.145 | 11.890 | 0 | 0 | -<br>0.063 | 0.926 | 0.056 |

|                   |                                       |          |        |        |        |        |       |         |        |   |   |        |       |       |
|-------------------|---------------------------------------|----------|--------|--------|--------|--------|-------|---------|--------|---|---|--------|-------|-------|
| <b>832-69-9</b>   | 1-Methylphenanthrene                  | Training | -1.721 | -1.408 | 0.314  | 0.744  | 0.026 | 154.746 | 11.890 | 1 | 5 | 0.055  | 1.138 | 0.299 |
| <b>84-15-1</b>    | o-Terphenyl                           | Training | -0.499 | -1.087 | -0.588 | -1.429 | 0.072 | 148.112 | 11.850 | 1 | 4 | 0.046  | 1.027 | 0.333 |
| <b>85-01-8</b>    | Phenanthrene                          | Training | -1.122 | -1.616 | -0.494 | -1.188 | 0.053 | 153.631 | 11.850 | 1 | 4 | 0.055  | 1.139 | 0.125 |
| <b>872-05-9</b>   | 1-decene                              | Training | -0.991 | -1.064 | -0.072 | -0.173 | 0.034 | 166.432 | 11.890 | 0 | 0 | -0.069 | 0.916 | 0.056 |
| <b>88671-89-0</b> | Myclobutanil                          | Training | -2.097 | -1.536 | 0.561  | 1.390  | 0.105 | 162.237 | 11.890 | 1 | 1 | -0.107 | 0.619 | 0.684 |
| <b>91-17-8</b>    | t-decalin                             | Training | -0.068 | -0.897 | -0.830 | -2.004 | 0.060 | 171.594 | 11.900 | 0 | 0 | 0.062  | 0.764 | 0.000 |
| <b>91-20-3</b>    | Naphthalene                           | Training | -2.301 | -2.034 | 0.267  | 0.656  | 0.090 | 162.291 | 11.850 | 1 | 2 | 0.042  | 1.043 | 0.000 |
| <b>91-57-6</b>    | 2-Methylnaphthalene                   | Training | -2.000 | -1.588 | 0.412  | 0.988  | 0.045 | 159.982 | 11.890 | 1 | 3 | 0.041  | 1.047 | 0.083 |
| <b>92-06-8</b>    | m-terphenyl                           | Training | -1.347 | -1.266 | 0.081  | 0.196  | 0.057 | 151.381 | 11.850 | 1 | 4 | 0.046  | 0.969 | 0.500 |
| <b>92-51-3</b>    | Bicyclohexyl                          | Training | -0.770 | -0.542 | 0.227  | 0.543  | 0.039 | 166.327 | 11.900 | 0 | 0 | 0.052  | 0.897 | 0.139 |
| <b>933-12-0</b>   | 3,5,5 Trimethyl cyclohexene           | Training | -1.137 | -0.943 | 0.194  | 0.463  | 0.036 | 166.852 | 11.900 | 0 | 0 | 0.000  | 1.184 | 0.000 |
| <b>93-46-9</b>    | N,N'-Di-2-naphthyl-p-phenyleneDiamine | Training | -1.096 | -1.512 | -0.416 | -0.998 | 0.047 | 155.106 | 11.850 | 1 | 4 | 0.074  | 0.966 | 0.361 |
| <b>94361-06-5</b> | Cyproconazole                         | Training | -1.959 | -1.405 | 0.554  | 1.354  | 0.081 | 164.796 | 11.900 | 1 | 1 | -0.037 | 0.639 | 0.771 |
| <b>98-51-1</b>    | 1-tert butyl-4-methyl benzene         | Training | -1.018 | -1.015 | 0.003  | 0.006  | 0.027 | 165.778 | 11.890 | 0 | 2 | 0.000  | 0.945 | 0.354 |

**Table S2** – Dataset 2: Dataset based only on low quality with experimental Log BMFL (low) and predicted Log BMFL (by Equation 2).

| CAS         | Chemical Name                                                                                                                                                       | SMILES                                                                                                                                              | Log_BMFL<br>LowQuality | Log_BMFL<br>Pred. by model eq. |
|-------------|---------------------------------------------------------------------------------------------------------------------------------------------------------------------|-----------------------------------------------------------------------------------------------------------------------------------------------------|------------------------|--------------------------------|
| 1024-57-3   | 2,3,4,5,6,7,7-Heptachloro-1a,1b,5,5a,6,6a,-<br>Hexahydro-(2a alpha, 1b beta, 2 alpha, 5 alpha, 5a<br>beta, 6 beta, 6a alpha-2,5-methano-2H-indeno[1,2-<br>b]oxirene | <chem>ClC1C2OC2C2C1C1(Cl)C(=C(C2(C1(Cl)Cl)Cl)Cl)Cl</chem>                                                                                           | 0.415                  | 0.319                          |
| 10605-21-7  | Carbendazim                                                                                                                                                         | <chem>COC(=O)Nc1nc2c([nH]1)cccc2</chem>                                                                                                             | -3.745                 | -1.807                         |
| 117-81-7    | Di-2-Ethylhexyl phthalate                                                                                                                                           | <chem>CCCCC(COC(=O)c1cccc1C(=O)OCC(CCCC)CC)CC</chem>                                                                                                | -1.125                 | -1.041                         |
| 120068-36-2 | Fipronil sulfone                                                                                                                                                    | <chem>N#Cc1nn(c(c1S(=O)(=O)C(F)(F)F)N)c1c(Cl)cc(cc1Cl)C(F)(F)F</chem>                                                                               | 0.777                  | -1.418                         |
| 129-00-0    | Pyrene                                                                                                                                                              | <chem>c1cc2ccc3c4c2c(c1)ccc4ccc3</chem>                                                                                                             | -2.301                 | -1.771                         |
| 131860-33-8 | Azoxystrobin                                                                                                                                                        | <chem>COC=C(c1cccc1Oc1nnc(c1)Oc1cccc1C#N)C(=O)OC</chem>                                                                                             | -3.347                 | -2.205                         |
| 15299-99-7  | Napropamide                                                                                                                                                         | <chem>CCN(C(=O)C(Oc1cccc2c1cccc2)C)CC</chem>                                                                                                        | -2.852                 | -2.203                         |
| 1746-01-6   | 2,3,7,8-Tetrachlorodibenzo[b,e][1,4]Dioxin                                                                                                                          | <chem>Clc1cc2Occc(Cl)c(cc3Occc1Cl)Cl</chem>                                                                                                         | 0.103                  | 0.612                          |
| 2051-24-3   | Decachlorobiphenyl                                                                                                                                                  | <chem>Clc1c(c2c(Cl)c(Cl)c(c2Cl)Cl)Cl)c(Cl)c(c(c1Cl)Cl)Cl</chem>                                                                                     | 0.319                  | 1.048                          |
| 205646-11-3 | 1,2,9,10-Tetrachlorodecane                                                                                                                                          | <chem>ClCC(CCCCCC(CCl)Cl)Cl</chem>                                                                                                                  | -0.658                 | 0.035                          |
| 208465-21-8 | Mesosulfuron-methyl                                                                                                                                                 | <chem>COC(=O)c1ccc(cc1S(=O)(=O)NC(=O)Nc1nc(OC)cc(n1)OC)CN<br/>S(=O)(=O)C</chem>                                                                     | -5.699                 | -1.274                         |
| 2136-99-4   | 2,2',3,3',5,5',6,6'-Octachlorobiphenyl                                                                                                                              | <chem>Clc1c(Cl)cc(c(c1c1c(Cl)c(Cl)cc(c1Cl)Cl)Cl)Cl</chem>                                                                                           | 0.667                  | 1.026                          |
| 221155-23-3 | 1,2,13,14-Tetrachlorotetradecane                                                                                                                                    | <chem>ClCC(CCCCCCCCCC(CCl)Cl)Cl</chem>                                                                                                              | 0.100                  | 0.194                          |
| 2381-21-7   | 1-Methylpyrene                                                                                                                                                      | <chem>Cc1ccc2c3c1ccc1c3c(cc2)ccc1</chem>                                                                                                            | -2.301                 | -1.489                         |
| 2385-85-5   | Mirex                                                                                                                                                               | <chem>ClC12C(Cl)(Cl)C3(C4(C1(Cl)C1(C2(Cl)C3(C4(C1(Cl)Cl)Cl)Cl)Cl)Cl)Cl</chem>                                                                       | 0.371                  | 1.549                          |
| 2437-79-8   | 2,2',4,4'-Tetrachlorobiphenyl                                                                                                                                       | <chem>Clc1ccc(c(c1)Cl)c1ccc(cc1Cl)Cl</chem>                                                                                                         | 0.833                  | 0.370                          |
| 2471-09-2   | OctacosamethylTridecasiloxane                                                                                                                                       | <chem>C[Si](O[Si](O[Si](O[Si](O[Si](O[Si](O[Si](C)(C)C)(C)C)(C)C)(C)C)(C)C)(O[Si](O[Si](O[Si](O[Si](O[Si](O[Si](C)(C)C)(C)C)(C)C)(C)C)(C)C)C</chem> | -1.699                 | 2.531                          |
| 2471-10-5   | Triacontamethyltetradecasiloxane                                                                                                                                    | <chem>C[Si](O[Si](O[Si](O[Si](O[Si](O[Si](O[Si](C)(C)C)(C)C)(C)C)(C)C)(C)C)(O[Si](O[Si](O[Si](O[Si](O[Si](O[Si](C)(C)C)(C)C)(C)C)(C)C)(C)C)C</chem> | -1.699                 | 2.715                          |
| 2652-13-3   | Eicosamethylnonasiloxane                                                                                                                                            | <chem>C[Si](O[Si](O[Si](O[Si](O[Si](C)(C)C)(C)C)(C)C)(C)C)(O[Si](O[Si](O[Si](O[Si](C)(C)C)(C)C)(C)C)(C)C)C</chem>                                   | -1.097                 | 1.858                          |
| 27575-78-6  | Tris(4-chlorophenyl)methane                                                                                                                                         | <chem>Clc1ccc(cc1)C(c1ccc(cc1)Cl)c1ccc(cc1)Cl</chem>                                                                                                | 0.538                  | 0.836                          |
| 3010-80-8   | Tris(4-chlorophenyl)methanol                                                                                                                                        | <chem>OC(c1ccc(cc1)Cl)(c1ccc(cc1)Cl)c1ccc(cc1)Cl</chem>                                                                                             | -0.260                 | 0.997                          |
| 31508-00-6  | 2,3',4,4',5-Pentachlorobiphenyl                                                                                                                                     | <chem>Clc1cc(Cl)c(cc1c1ccc(c(c1)Cl)Cl)Cl</chem>                                                                                                     | 0.776                  | 0.531                          |
| 32598-10-0  | 2,3',4,4'-Tetrachlorobiphenyl                                                                                                                                       | <chem>Clc1ccc(c(c1)Cl)c1ccc(c(c1)Cl)Cl</chem>                                                                                                       | 0.470                  | 0.392                          |
| 32598-11-1  | 2,3',4',5-Tetrachlorobiphenyl                                                                                                                                       | <chem>Clc1ccc(c(c1)c1ccc(c(c1)Cl)Cl)Cl</chem>                                                                                                       | 0.771                  | 0.446                          |
| 32598-14-4  | 2,3,3',4,4'-Pentachlorobiphenyl                                                                                                                                     | <chem>Clc1ccc(cc1Cl)c1ccc(c(c1Cl)Cl)Cl</chem>                                                                                                       | 0.740                  | 0.406                          |

|            |                                          |                                                  |        |        |
|------------|------------------------------------------|--------------------------------------------------|--------|--------|
| 32690-93-0 | 2,4,4',5-Tetrachlorobiphenyl             | Clc1ccc(cc1)c1cc(Cl)c(cc1Cl)Cl                   | 0.903  | 0.506  |
| 3322-93-8  | Tetrabromoethylcyclohexane $\beta$       | BrCC(C1CCC(C(Cl)Br)Br)Br                         | -0.318 | 0.239  |
| 33284-50-3 | 2,4-Dichlorobiphenyl                     | Clc1ccc(c(c1)Cl)c1ccccc1                         | 0.703  | 0.170  |
| 33284-52-5 | 3,3',5,5'-Tetrachlorobiphenyl            | Clc1cc(cc(c1)Cl)c1cc(Cl)cc(c1)Cl                 | 0.457  | 0.291  |
| 34123-59-6 | Isoproturon                              | O=C(N(C)C)Nc1ccc(cc1)C(C)C                       | -3.211 | -0.719 |
| 34883-39-1 | 2,5-Dichlorobiphenyl                     | Clc1ccc(c(c1)c1ccccc1)Cl                         | -0.638 | 0.268  |
| 35065-28-2 | 2,2',3,4,4',5'-Hexachlorobiphenyl        | Clc1cc(Cl)c(cc1c1ccc(c(c1Cl)Cl)Cl)Cl             | 0.803  | 0.577  |
| 35065-29-3 | 2,2',3,4,4',5,5'-Heptachlorobiphenyl     | Clc1cc(Cl)c(cc1c1cc(Cl)c(c(c1Cl)Cl)Cl)Cl         | 0.842  | 0.701  |
| 35065-30-6 | 2,2',3,3',4,4',5-Heptachlorobiphenyl     | Clc1c(Cl)ccc(c1Cl)c1cc(Cl)c(c(c1Cl)Cl)Cl         | 0.851  | 0.586  |
| 35693-99-3 | 2,2',5,5'-Tetrachlorobiphenyl            | Clc1ccc(cc1c1cc(Cl)ccc1Cl)Cl                     | 0.481  | 0.549  |
| 35694-06-5 | 2,2',3,4,4',5-Hexachlorobiphenyl         | Clc1ccc(c(c1)Cl)c1cc(Cl)c(c(c1Cl)Cl)Cl           | 0.836  | 0.600  |
| 35694-08-7 | 2,2',3,3',4,4',5,5'-Octachlorobiphenyl   | Clc1cc(c(c(c1Cl)Cl)Cl)c1cc(Cl)c(c(c1Cl)Cl)Cl     | 0.958  | 0.669  |
| 35822-46-9 | 1,2,3,4,6,7,8-H7CDD                      | Clc1c(Cl)cc2c(c1Cl)Oc1c(O2)c(Cl)c(c(c1Cl)Cl)Cl   | -0.469 | 0.644  |
| 36559-22-5 | 2,2',3,4'-Tetrachlorobiphenyl            | Clc1ccc(c(c1)Cl)c1ccccc1Cl                       | 0.572  | 0.334  |
| 36734-19-7 | Iprodione                                | CC(NC(=O)N)CC(=O)N(C1=O)c1cc(Cl)cc(c1)Cl)C       | -2.673 | -0.835 |
| 37680-66-3 | 2,2',4-Trichlorobiphenyl                 | Clc1ccc(c(c1)Cl)c1ccccc1Cl                       | 0.204  | 0.250  |
| 37680-73-2 | 2,2',4,5,5'-Pentachlorobiphenyl          | Clc1ccc(c(c1)c1cc(Cl)c(cc1Cl)Cl)Cl               | 0.783  | 0.631  |
| 38379-99-6 | 2,2',3,5',6-Pentachlorobiphenyl          | Clc1ccc(c(c1)c1c(Cl)ccc(c1Cl)Cl)Cl               | 0.734  | 0.605  |
| 38380-02-8 | 2,2',3,4,5'-Pentachlorobiphenyl          | Clc1ccc(c(c1)c1ccc(c(c1Cl)Cl)Cl)Cl               | 0.760  | 0.506  |
| 38380-03-9 | 2,3,3',4',6-Pentachlorobiphenyl          | Clc1cc(ccc1Cl)c1c(Cl)ccc(c1Cl)Cl                 | 0.919  | 0.381  |
| 38380-04-0 | 2,2',3,4',5',6-Hexachlorobiphenyl        | Clc1cc(Cl)c(cc1c1c(Cl)ccc(c1Cl)Cl)Cl             | 0.792  | 0.674  |
| 38380-05-1 | 2,2',3,3',4,6'-Hexachlorobiphenyl        | Clc1ccc(c(c1Cl)Cl)c1c(Cl)ccc(c1Cl)Cl             | 0.743  | 0.556  |
| 38380-07-3 | 2,2',3,3',4,4'-Hexachlorobiphenyl        | Clc1c(ccc(c1Cl)Cl)c1ccc(c(c1Cl)Cl)Cl             | 0.769  | 0.459  |
| 38380-08-4 | 2,3,3',4,4',5-Hexachlorobiphenyl         | Clc1ccc(cc1Cl)c1cc(Cl)c(c(c1Cl)Cl)Cl             | 0.869  | 0.528  |
| 38411-22-2 | 2,2',3,3',6,6'-Hexachlorobiphenyl        | Clc1ccc(c(c1c1c(Cl)ccc(c1Cl)Cl)Cl)Cl             | 0.678  | 0.771  |
| 38411-25-5 | 2,2',3,3',4,5,6'-Heptachlorobiphenyl     | Clc1c(Cl)cc(c(c1Cl)Cl)c1c(Cl)ccc(c1Cl)Cl         | 0.830  | 0.705  |
| 38444-76-7 | 2,3',6-Trichlorobiphenyl                 | Clc1cccc(c1)c1c(Cl)cccc1Cl                       | -0.046 | 0.062  |
| 38444-81-4 | 2,3',5-Trichlorobiphenyl                 | Clc1ccc(c(c1)c1ccccc1)Cl)Cl                      | 0.653  | 0.333  |
| 38444-84-7 | 2,3,3'-Trichlorobiphenyl                 | Clc1cccc(c1)c1ccccc1Cl)Cl                        | -0.222 | 0.173  |
| 38444-93-8 | 2,2',3,3'-Tetrachlorobiphenyl            | Clc1c(Cl)cccc1c1ccccc1Cl)Cl                      | 0.514  | 0.274  |
| 39227-61-7 | 1,2,3,4,7-P5CDD                          | Clc1ccc2c(c1)Oc1c(O2)c(Cl)c(c(c1Cl)Cl)Cl         | -1.092 | 0.703  |
| 39635-31-9 | 2,3,3',4,4',5,5'-Heptachlorobiphenyl     | Clc1cc(cc(c1Cl)Cl)c1cc(Cl)c(c(c1Cl)Cl)Cl         | 0.631  | 0.514  |
| 40186-70-7 | 2,2',3,3',4,5',6-Heptachlorobiphenyl     | Clc1cc(Cl)c(c(c1)c1c(Cl)cc(c(c1Cl)Cl)Cl)Cl       | 0.778  | 0.705  |
| 40186-71-8 | 2,2',3,3',4,5',6,6'-Octachlorobiphenyl   | Clc1cc(Cl)c(c(c1Cl)Cl)c1c(Cl)c(Cl)cc(c1Cl)Cl     | 0.803  | 0.954  |
| 40186-72-9 | 2,2',3,3',4,4',5,5',6-Nonachlorobiphenyl | Clc1cc(c(c(c1Cl)Cl)Cl)c1c(Cl)c(Cl)c(c(c1Cl)Cl)Cl | 0.531  | 0.804  |
| 41464-41-9 | 2,2',5,6'-Tetrachlorobiphenyl            | Clc1ccc(c(c1)c1c(Cl)cccc1Cl)Cl                   | -0.398 | 0.437  |
| 41464-43-1 | 2,3,3',4'-Tetrachlorobiphenyl            | Clc1cc(ccc1Cl)c1ccccc1Cl)Cl                      | 0.667  | 0.309  |
| 41464-46-4 | 2,3',4',6-Tetrachlorobiphenyl            | Clc1cc(ccc1Cl)c1c(Cl)cccc1Cl                     | 0.322  | 0.220  |
| 41464-47-5 | 2,2',3,6'-Tetrachlorobiphenyl            | Clc1c(Cl)cccc1c1c(Cl)cccc1Cl                     | -0.398 | 0.299  |
| 41464-51-1 | 2,2',3',4,5-Pentachlorobiphenyl          | Clc1cc(Cl)c(cc1c1ccccc1Cl)Cl)Cl                  | 0.842  | 0.506  |

|            |                                                                          |                                                                                                            |        |        |
|------------|--------------------------------------------------------------------------|------------------------------------------------------------------------------------------------------------|--------|--------|
| 42740-50-1 | 2,2',3,3',4,4',5,6'-Octachlorobiphenyl                                   | Clc1cc(Cl)c(c(c1c1cc(Cl)c(c(c1Cl)Cl)Cl)Cl)Cl                                                               | 0.833  | 0.741  |
| 483-65-8   | 1-methyl-7-(1methylethyl)-phenanthrene                                   | CC(c1ccc2c(c1)ccc1c2cccc1C)C                                                                               | -1.553 | -1.545 |
| 50-29-3    | 4,4'-DDT                                                                 | ClC(C(c1ccc(cc1)Cl)c1ccc(cc1)Cl)(Cl)Cl                                                                     | 0.752  | -0.009 |
| 50563-36-5 | Dimethachlor                                                             | COCCN(c1c(C)cccc1C)C(=O)CCl                                                                                | -4.462 | -0.420 |
| 5103-74-2  | 1,2,4,5,6,7,8,8-Octachloro-2,3,3a,4,7,7a-Hexahydro-4,7-methano-1H-indene | ClC1CC2C(C1Cl)C1(C(C2(Cl)C(=C1Cl)Cl)(Cl)Cl)Cl                                                              | 0.326  | 0.645  |
| 51908-16-8 | 2,2',3,4',5,5'-Hexachlorobiphenyl                                        | Clc1cc(Cl)c(c(c1)c1cc(Cl)c(cc1Cl)Cl)Cl                                                                     | 0.916  | 0.649  |
| 52663-58-8 | 2,3,4',6-Tetrachlorobiphenyl                                             | Clc1ccc(cc1)c1c(Cl)ccc(c1Cl)Cl                                                                             | 0.806  | 0.310  |
| 52663-60-2 | 2,2',3,3',6-Pentachlorobiphenyl                                          | Clc1c(Cl)cccc1c1c(Cl)ccc(c1Cl)Cl                                                                           | 0.505  | 0.480  |
| 52663-61-3 | 2,2',3,5,5'-Pentachlorobiphenyl                                          | Clc1ccc(c(c1)c1cc(Cl)cc(c1Cl)Cl)Cl                                                                         | 0.744  | 0.579  |
| 52663-62-4 | 2,2',3,3',4-Pentachlorobiphenyl                                          | Clc1ccc(c(c1Cl)Cl)c1cccc(c1Cl)Cl                                                                           | 0.738  | 0.381  |
| 52663-65-7 | 2,2',3,3',4,6,6'-Heptachlorobiphenyl                                     | Clc1cc(Cl)c(c(c1Cl)Cl)c1c(Cl)ccc(c1Cl)Cl                                                                   | 0.767  | 0.823  |
| 52663-66-8 | 2,2',3,3',4,5'-Hexachlorobiphenyl                                        | Clc1cc(Cl)c(c(c1)c1ccc(c(c1Cl)Cl)Cl)Cl                                                                     | 0.431  | 0.530  |
| 52663-68-0 | 2,2',3,4',5,5',6-Heptachlorobiphenyl                                     | Clc1cc(Cl)c(cc1c1c(Cl)c(Cl)cc(c1Cl)Cl)Cl                                                                   | 0.756  | 0.798  |
| 52663-69-1 | 2,2',3,4,4',5',6-Heptachlorobiphenyl                                     | Clc1cc(Cl)c(cc1c1c(Cl)cc(c(c1Cl)Cl)Cl)Cl                                                                   | 0.790  | 0.727  |
| 52663-70-4 | 2,2',3,3',4,5',6'-Heptachlorobiphenyl                                    | Clc1ccc(c(c1Cl)Cl)c1c(Cl)c(Cl)cc(c1Cl)Cl                                                                   | 0.796  | 0.682  |
| 52663-71-5 | 2,2',3,3',4,4',6-Heptachlorobiphenyl                                     | Clc1c(Cl)cc(c(c1Cl)c1ccc(c(c1Cl)Cl)Cl)Cl                                                                   | 0.848  | 0.611  |
| 52663-72-6 | 2,3',4,4',5,5'-Hexachlorobiphenyl                                        | Clc1cc(Cl)c(cc1c1cc(Cl)c(c(c1)Cl)Cl)Cl                                                                     | 0.732  | 0.552  |
| 52663-74-8 | 2,2',3,3',4,5,5'-Heptachlorobiphenyl                                     | Clc1cc(Cl)c(c(c1)c1cc(Cl)c(c(c1Cl)Cl)Cl)Cl                                                                 | 0.854  | 0.633  |
| 52663-75-9 | 2,2',3,3',4,5,5',6'-Octachlorobiphenyl                                   | Clc1c(Cl)cc(c(c1Cl)Cl)c1c(Cl)c(Cl)cc(c1Cl)Cl                                                               | 0.820  | 0.789  |
| 52663-77-1 | 2,2',3,3',4,5,5',6,6'-Nonachlorobiphenyl                                 | Clc1c(Cl)c(Cl)c(c(c1Cl)Cl)c1c(Cl)c(Cl)cc(c1Cl)Cl                                                           | 0.728  | 1.048  |
| 52663-78-2 | 2,2',3,3',4,4',5,6-Octachlorobiphenyl                                    | Clc1ccc(c(c1Cl)Cl)c1c(Cl)c(Cl)c(c(c1Cl)Cl)Cl                                                               | 0.641  | 0.717  |
| 52663-79-3 | 2,2',3,3',4,4',5,6,6'-Nonachlorobiphenyl                                 | Clc1c(Cl)cc(c(c1Cl)c1c(Cl)c(Cl)c(c(c1Cl)Cl)Cl)Cl                                                           | 0.799  | 0.975  |
| 52712-04-6 | 2,2',3,4,5,5'-Hexachlorobiphenyl                                         | Clc1ccc(c(c1)c1cc(Cl)c(c(c1Cl)Cl)Cl)Cl                                                                     | 0.839  | 0.649  |
| 52712-05-7 | 2,2',3,4,5,5',6-Heptachlorobiphenyl                                      | Clc1ccc(c(c1)c1c(Cl)c(Cl)c(c(c1Cl)Cl)Cl)Cl                                                                 | 0.845  | 0.798  |
| 52744-13-5 | 2,2',3,3',5,6'-Hexachlorobiphenyl                                        | Clc1cc(Cl)c(c(c1)c1c(Cl)ccc(c1Cl)Cl)Cl                                                                     | 0.724  | 0.651  |
| 53-19-0    | o,p'-DDD                                                                 | ClC(C(c1cccc1Cl)c1ccc(cc1)Cl)Cl                                                                            | 0.380  | 0.056  |
| 541-01-5   | Hexadecamethylheptasiloxane                                              | C[Si](O[Si](O[Si](O[Si](C)(C)C)(C)C)(C)C)(O[Si](O[Si](O[Si](C)(C)C)(C)C)(C)C)C                             | -1.398 | 1.546  |
| 544-76-3   | n-Hexadecane                                                             | CCCCCCCCCCCCCCCC                                                                                           | -0.314 | -1.040 |
| 55215-18-4 | 2,2',3,3',4,5-Hexachlorobiphenyl                                         | Clc1cccc(c1Cl)c1cc(Cl)c(c(c1Cl)Cl)Cl                                                                       | 0.839  | 0.530  |
| 556-69-4   | Octadecamethyloctasiloxane                                               | C[Si](O[Si](O[Si](O[Si](C)(C)C)(C)C)(C)C)(O[Si](O[Si](O[Si](O[Si](C)(C)C)(C)C)(C)C)C                       | -0.796 | 1.698  |
| 556-70-7   | Docosamethyldeasiloxane                                                  | C[Si](O[Si](O[Si](O[Si](O[Si](C)(C)C)(C)C)(C)C)(C)C)(O[Si](O[Si](O[Si](O[Si](O[Si](C)(C)C)(C)C)(C)C)(C)C)C | -1.222 | 2.023  |
| 56-55-3    | Benzo[a]anthracene                                                       | c1ccc2c(c1)cc1c(c2)ccc2c1cccc2                                                                             | -2.301 | -1.614 |
| 60145-20-2 | 2,2',3,3',5-Pentachlorobiphenyl                                          | Clc1cc(Cl)c(c(c1)c1cccc(c1Cl)Cl)Cl                                                                         | 0.761  | 0.454  |
| 60145-23-5 | 2,2',3,4,4',5,6'-Heptachlorobiphenyl                                     | Clc1cc(Cl)c(c(c1)Cl)c1cc(Cl)c(c(c1Cl)Cl)Cl                                                                 | 0.836  | 0.658  |
| 60233-25-2 | 2,2',3,4',6'-Pentachlorobiphenyl                                         | Clc1cc(Cl)c(c(c1)Cl)c1cccc(c1Cl)Cl                                                                         | 0.230  | 0.406  |
| 67129-08-2 | Metazachlor                                                              | ClCC(=O)N(c1c(C)cccc1C)Cn1cccn1                                                                            | -4.493 | -0.884 |

|                   |                                                                           |                                                                             |        |        |
|-------------------|---------------------------------------------------------------------------|-----------------------------------------------------------------------------|--------|--------|
| <b>68194-14-9</b> | 2,2',3,4,5',6-Hexachlorobiphenyl                                          | <chem>Clc1ccc(c(c1)c1c(Cl)cc(c(c1Cl)Cl)Cl)Cl</chem>                         | 0.799  | 0.674  |
| <b>7012-37-5</b>  | 2,4,4'-Trichlorobiphenyl                                                  | <chem>Clc1ccc(cc1)c1ccc(cc1Cl)Cl</chem>                                     | 0.290  | 0.322  |
| <b>70362-45-7</b> | 2,2',3,6-Tetrachlorobiphenyl                                              | <chem>Clc1ccccc1c1c(Cl)ccc(c1Cl)Cl</chem>                                   | 0.568  | 0.414  |
| <b>70362-46-8</b> | 2,2',3,5-Tetrachlorobiphenyl                                              | <chem>Clc1cc(Cl)c(c(c1)c1ccccc1Cl)Cl</chem>                                 | 0.829  | 0.435  |
| <b>70424-68-9</b> | 2,3,3',4',5-Pentachlorobiphenyl                                           | <chem>Clc1cc(Cl)c(c(c1)c1ccc(c(c1)Cl)Cl)Cl</chem>                           | 1.033  | 0.457  |
| <b>70424-70-3</b> | 2,3',4',5,5'-Pentachlorobiphenyl                                          | <chem>Clc1ccc(c(c1)c1cc(Cl)c(c(c1)Cl)Cl)Cl</chem>                           | 0.380  | 0.480  |
| <b>71888-89-6</b> | Diisooheptyl phthalate                                                    | <chem>CC(CCCCOC(=O)c1ccccc1C(=O)OCCCCC(C)C)C</chem>                         | -2.509 | -1.121 |
| <b>72-54-8</b>    | p,p'-DDD                                                                  | <chem>ClC(C(c1ccc(cc1)Cl)c1ccc(cc1)Cl)Cl</chem>                             | 0.602  | 0.023  |
| <b>74472-33-6</b> | 2,3,3',6-Tetrachlorobiphenyl                                              | <chem>Clc1cccc(c1)c1c(Cl)ccc(c1Cl)Cl</chem>                                 | 0.720  | 0.274  |
| <b>74472-34-7</b> | 2,3,4',5-Tetrachlorobiphenyl                                              | <chem>Clc1ccc(cc1)c1cc(Cl)cc(c1Cl)Cl</chem>                                 | 0.857  | 0.446  |
| <b>74472-37-0</b> | 2,3,4,4',5-Pentachlorobiphenyl                                            | <chem>Clc1ccc(cc1)c1cc(Cl)c(c(c1Cl)Cl)Cl</chem>                             | 0.829  | 0.531  |
| <b>74472-42-7</b> | 2,3,3',4,4',6-Hexachlorobiphenyl                                          | <chem>Clc1ccc(cc1Cl)c1c(Cl)cc(c(c1Cl)Cl)Cl</chem>                           | 0.826  | 0.459  |
| <b>74472-44-9</b> | 2,3,3',4',5,6-Hexachlorobiphenyl                                          | <chem>Clc1cc(ccc1Cl)c1c(Cl)c(Cl)cc(c1Cl)Cl</chem>                           | 0.929  | 0.507  |
| <b>74472-53-0</b> | 2,3,3',4,4',5,5',6-Octachlorobiphenyl                                     | <chem>Clc1c(Cl)cc(cc1Cl)c1c(Cl)c(Cl)c(c(c1Cl)Cl)Cl</chem>                   | 0.806  | 0.552  |
| <b>779-02-2</b>   | 9-Methylanthracene                                                        | <chem>Cc1c2ccccc2cc2c1cccc2</chem>                                          | -2.398 | -1.425 |
| <b>789-02-6</b>   | 1-Chloro-2-(2,2,2-Trichloro-1-(4-chlorophenyl)ethyl)benzene (o,p'-DDT)    | <chem>Clc1ccc(cc1)C(C(Cl)(Cl)Cl)c1ccccc1Cl</chem>                           | 0.839  | 0.114  |
| <b>79277-27-3</b> | Thifensulfuron-methyl                                                     | <chem>COc1nc(nc(n1)C)NC(=O)NS(=O)(=O)c1ccsc1C(=O)OC</chem>                  | -4.297 | -1.816 |
| <b>81777-89-1</b> | Clomazone                                                                 | <chem>O=C1N(OCC1(C)C)Cc1ccccc1Cl</chem>                                     | -3.699 | 0.543  |
| <b>83164-33-4</b> | Diflufenican                                                              | <chem>Fc1ccc(c(c1)F)NC(=O)c1ccnc1Oc1cccc(c1)C(F)(F)F</chem>                 | -2.991 | -0.847 |
| <b>84632-59-7</b> | 3,6-Bis-(4-tert-butyl-phenyl)-2,5-dihydro-pyrrolo[3,4-c]pyrrole-1,4-dione | <chem>CC(c1ccc(cc1)c1[nH]c(=O)c2c1c(=O)[nH]c2c1ccc(cc1)C(C)(C)C)(C)C</chem> | -1.413 | -1.228 |

**Table S3** – Dataset 3: Consistent dataset based on high quality data (Dataset 1) and verified low quality data from Dataset 2. Chemicals are reported with CAS numbers, names, splitting category (Training or Prediction set), experimental and predicted Log BMFL, standardized residuals, HAT values and values of the molecular descriptors included in the model.

| CAS         | Chemical Name                                                                                                                                            | Split. Eq. 3 | Exp BMFL | Pred BMFL | Pred.Mod. Eq.Res. | Std.Pred. Mod.Eq. Res. | HAT i/i (h*=0.12) | PubchemFP503 | SubFP C295 | R_TpiP CTPC | MLF ER_S | maxHother  | GGI5  | VE3_Dt  |
|-------------|----------------------------------------------------------------------------------------------------------------------------------------------------------|--------------|----------|-----------|-------------------|------------------------|-------------------|--------------|------------|-------------|----------|------------|-------|---------|
| 4390-04-9   | 2,2,4,4,6,8,8-heptamethyl nonane                                                                                                                         | Training     | 0.004    | -0.513    | -0.518            | -1.247                 | 0.093             | 0            | 0          | 1.000       | -0.149   | 0          | 0.778 | -4.765  |
| 1024-57-3   | 2,3,4,5,6,7,7-Heptachloro-1a,1b,5,5a,6,6a,-Hexahydro-(2a alpha, 1b beta, 2 alpha, 5 alpha, 5a beta, 6 beta, 6a alpha-2,5-methano-2H-indeno[1,2-b]oxirene | Training     | 0.415    | -0.352    | -0.767            | -1.851                 | 0.095             | 0            | 2          | 1.387       | 1.581    | 0          | 0.789 | -7.426  |
| 10394-57-7  | 9-n butylphenanthrene                                                                                                                                    | Training     | -1.854   | -1.512    | 0.342             | 0.795                  | 0.024             | 0            | 0          | 15.938      | 1.237    | 0.43540529 | 0.389 | -3.214  |
| 104-72-3    | Decyl benzene                                                                                                                                            | Prediction   | -0.745   | -1.246    | -0.501            | -1.180                 | 0.049             | 0            | 0          | 2.553       | 0.553    | 0.41190382 | 0.090 | -2.872  |
| 107534-96-3 | Tebuconazole                                                                                                                                             | Training     | -1.921   | -1.648    | 0.273             | 0.668                  | 0.119             | 1            | 6          | 3.259       | 1.415    | 0.68678148 | 0.893 | -3.078  |
| 111-84-2    | n-nonane                                                                                                                                                 | Training     | -0.893   | -0.734    | 0.159             | 0.371                  | 0.034             | 0            | 0          | 1.000       | 0.127    | 0          | 0.056 | -30.905 |
| 112281-77-3 | Tetraconazole                                                                                                                                            | Prediction   | -2.046   | -2.215    | -0.169            | -0.425                 | 0.169             | 1            | 7          | 3.957       | 1.406    | 0.75234702 | 0.847 | -2.903  |
| 112-40-3    | n-dodecane                                                                                                                                               | Prediction   | -0.878   | -0.850    | 0.028             | 0.065                  | 0.044             | 0            | 0          | 1.000       | 0.127    | 0          | 0.056 | 0.000   |
| 112-41-4    | 1-dodecene                                                                                                                                               | Training     | -0.941   | -1.352    | -0.410            | -0.965                 | 0.047             | 0            | 0          | 1.130       | 0.167    | 0.37125584 | 0.056 | 0.000   |
| 117-81-7    | Di-2-Ethylhexyl phthalate                                                                                                                                | Prediction   | -1.125   | -2.541    | -1.416            | -3.463                 | 0.119             | 0            | 6          | 3.007       | 1.313    | 0.55822961 | 0.917 | -99.355 |

|                    |                                                      |            |        |        |        |        |       |   |   |        |       |            |       |          |
|--------------------|------------------------------------------------------|------------|--------|--------|--------|--------|-------|---|---|--------|-------|------------|-------|----------|
| <b>118-74-1</b>    | Hexachlorobenzene                                    | Training   | 0.306  | -0.461 | -0.767 | -1.810 | 0.054 | 0 | 0 | 3.571  | 0.889 | 0          | 0.000 | -41.666  |
| <b>118-82-1</b>    | Binox M                                              | Prediction | 0.155  | 0.201  | 0.046  | 0.145  | 0.471 | 0 | 2 | 5.877  | 1.163 | 0.34168828 | 2.542 | -110.478 |
| <b>120068-37-3</b> | Fipronil                                             | Training   | -1.699 | -0.896 | 0.803  | 1.979  | 0.133 | 1 | 7 | 11.297 | 3.629 | 0.72210054 | 1.567 | -5.977   |
| <b>120-12-7</b>    | Anthracene                                           | Training   | -1.875 | -1.871 | 0.004  | 0.009  | 0.036 | 0 | 0 | 18.797 | 1.261 | 0.45       | 0.111 | -3.781   |
| <b>123-48-8</b>    | 2,2,4,4,6,6-pentamethyl-3-heptene                    | Training   | -1.284 | -0.746 | 0.538  | 1.263  | 0.043 | 0 | 0 | 1.449  | 0.045 | 0.20298611 | 0.500 | -44.916  |
| <b>125116-23-6</b> | Metconazole                                          | Training   | -1.721 | -1.571 | 0.151  | 0.365  | 0.103 | 1 | 6 | 2.956  | 1.526 | 0.68167944 | 0.858 | -6.290   |
| <b>126690-66-2</b> | 2,4,6-Trimethyl-3-heptene                            | Prediction | -1.041 | -0.971 | 0.070  | 0.162  | 0.027 | 0 | 0 | 1.436  | 0.125 | 0.24076389 | 0.222 | -35.127  |
| <b>129-00-0</b>    | Pyrene                                               | Training   | -2.301 | -1.862 | 0.439  | 1.046  | 0.071 | 0 | 0 | 24.028 | 1.503 | 0.45       | 0.111 | -54.942  |
| <b>13029-08-8</b>  | 2,2'-Dichlorophenyl                                  | Training   | 0.663  | 0.208  | -0.455 | -1.064 | 0.035 | 1 | 0 | 11.992 | 1.285 | 0.43138203 | 0.194 | -48.012  |
| <b>13150-81-7</b>  | 2,6-Dimethyldecane                                   | Prediction | -1.319 | -0.762 | 0.557  | 1.306  | 0.042 | 0 | 0 | 1.000  | 0.049 | 0          | 0.222 | -6.058   |
| <b>13151-34-3</b>  | 3-methyldecane                                       | Prediction | -1.699 | -0.825 | 0.874  | 2.049  | 0.042 | 0 | 0 | 1.000  | 0.088 | 0          | 0.111 | -2.673   |
| <b>13475-82-6</b>  | 2,2,4,6,6-pentamethylheptane                         | Training   | -0.728 | -0.509 | 0.219  | 0.516  | 0.052 | 0 | 0 | 1.000  | -0.07 | 0          | 0.500 | -42.581  |
| <b>14233-37-5</b>  | 9,10-Anthracenedione, 1,4-bis[(1-methylethyl)amino]- | Training   | -0.500 | -1.994 | -1.493 | -3.633 | 0.110 | 0 | 6 | 6.900  | 2.239 | 0.54155286 | 1.389 | -82.012  |
| <b>15254-25-8</b>  | 2,3,6,7-Tetramethylanthracene                        | Training   | -1.757 | -1.401 | 0.356  | 0.836  | 0.046 | 0 | 0 | 18.211 | 1.165 | 0.41611111 | 0.444 | -63.229  |
| <b>15299-99-7</b>  | Napropamide                                          | Training   | -2.852 | -3.083 | -0.231 | -0.554 | 0.089 | 0 | 6 | 7.742  | 1.935 | 0.52441397 | 0.486 | -1.468   |
| <b>15968-05-5</b>  | 2,2',6,6'-Tetrachlorobiphenyl                        | Training   | 0.623  | 0.441  | -0.183 | -0.427 | 0.036 | 1 | 0 | 11.576 | 1.475 | 0.40445169 | 0.250 | -55.555  |



|                   |                                                                   |            |        |        |        |        |       |   |   |        |       |                |       |          |
|-------------------|-------------------------------------------------------------------|------------|--------|--------|--------|--------|-------|---|---|--------|-------|----------------|-------|----------|
| <b>1610-22-6</b>  | 1,2,3,4,4a,7,8,<br>9,10,11,12,12a<br>-<br>dodecahydroc<br>hrysene | Training   | -0.770 | -0.569 | 0.200  | 0.472  | 0.049 | 0 | 0 | 3.137  | 0.853 | 0.3094<br>1185 | 0.361 | -62.901  |
| <b>16435-49-7</b> | 2-methyl-1-<br>dodecene                                           | Training   | -1.200 | -1.275 | -0.075 | -0.176 | 0.041 | 0 | 0 | 1.124  | 0.143 | 0.3434<br>7806 | 0.111 | -3.938   |
| <b>16606-02-3</b> | 2,4',5-<br>Trichlorobiphe<br>nyl                                  | Prediction | 0.525  | 0.254  | -0.271 | -0.628 | 0.014 | 1 | 0 | 12.277 | 1.418 | 0.4142<br>1382 | 0.389 | -4.806   |
| <b>1678-98-4</b>  | iso-butyl<br>cyclohexane                                          | Training   | -0.652 | -0.763 | -0.111 | -0.261 | 0.040 | 0 | 0 | 1.000  | 0.199 | 0              | 0.118 | -1.567   |
| <b>16958-92-2</b> | Diisotridecyl<br>adipate                                          | Training   | -1.959 | -2.172 | -0.213 | -0.573 | 0.273 | 0 | 6 | 1.114  | 0.989 | 0              | 0.222 | -129.757 |
| <b>1705-85-7</b>  | 6-<br>methylchysen<br>e                                           | Training   | -1.398 | -1.600 | -0.202 | -0.475 | 0.046 | 0 | 0 | 22.968 | 1.579 | 0.4460<br>9375 | 0.618 | -6.362   |
| <b>1706-50-9</b>  | 1,1':3,1'"Tercy<br>clohexane                                      | Training   | -0.357 | -0.152 | 0.205  | 0.478  | 0.037 | 0 | 0 | 1.000  | 0.421 | 0              | 0.500 | -64.879  |
| <b>17088-22-1</b> | 1-ethylpyrene                                                     | Training   | -1.699 | -1.750 | -0.051 | -0.120 | 0.045 | 0 | 0 | 22.804 | 1.479 | 0.4430<br>0733 | 0.458 | -5.362   |
| <b>17301-23-4</b> | 2,6-Dimethyl<br>undecane                                          | Training   | -1.027 | -0.731 | 0.296  | 0.694  | 0.043 | 0 | 0 | 1.000  | 0.049 | 0              | 0.278 | -4.472   |
| <b>17312-44-6</b> | 2,3<br>Dimethyldeca<br>ne                                         | Prediction | -1.585 | -0.812 | 0.773  | 1.814  | 0.043 | 0 | 0 | 1.000  | 0.049 | 0              | 0.167 | -2.336   |
| <b>1732-13-4</b>  | 1,2,3,6,7,8<br>Hexahydropyr<br>ene                                | Training   | -1.252 | -0.986 | 0.266  | 0.625  | 0.043 | 0 | 0 | 8.114  | 1.123 | 0.3640<br>2778 | 0.111 | -56.051  |
| <b>1746-01-6</b>  | 2,3,7,8-<br>Tetrachlorodib<br>enzo[b,e][1,4]<br>Dioxin            | Training   | 0.103  | -0.391 | -0.495 | -1.182 | 0.078 | 1 | 4 | 7.554  | 2.419 | 0.5226<br>2086 | 0.444 | -63.229  |
| <b>1795-15-9</b>  | n - Octyl<br>Cyclohexane                                          | Prediction | -1.222 | -0.756 | 0.466  | 1.091  | 0.040 | 0 | 0 | 1.000  | 0.238 | 0              | 0.090 | -2.449   |
| <b>18094-01-4</b> | 2 methyl 1-<br>Tridecene                                          | Prediction | -0.921 | -1.270 | -0.350 | -0.819 | 0.041 | 0 | 0 | 1.110  | 0.143 | 0.3419<br>9877 | 0.111 | -4.357   |
| <b>1836-75-5</b>  | 2,4-Dichloro-<br>1-(4-<br>nitrophenoxy)<br>benzene                | Training   | -0.821 | -0.855 | -0.034 | -0.080 | 0.040 | 1 | 3 | 7.060  | 1.539 | 0.6406<br>5558 | 0.417 | -4.690   |

|                    |                                                        |            |        |        |        |        |       |   |   |        |       |                |       |         |
|--------------------|--------------------------------------------------------|------------|--------|--------|--------|--------|-------|---|---|--------|-------|----------------|-------|---------|
| <b>1839-63-0</b>   | 1,3,5-Trimethylcyclohexane                             | Training   | -0.456 | -0.739 | -0.283 | -0.662 | 0.035 | 0 | 0 | 1.000  | 0.16  | 0              | 0.000 | -34.311 |
| <b>18516-37-5</b>  | 2-methyl-1-undecene                                    | Training   | -1.456 | -1.280 | 0.176  | 0.413  | 0.041 | 0 | 0 | 1.141  | 0.143 | 0.3452<br>1417 | 0.111 | -3.532  |
| <b>1889-67-4</b>   | Benzene, 1,1'-(1,1,2,2-tetramethyl-1,2-ethaneDiyl)bis- | Training   | -0.777 | -0.654 | 0.123  | 0.293  | 0.069 | 0 | 0 | 4.834  | 0.821 | 0.4089<br>6259 | 0.625 | -63.275 |
| <b>191-24-2</b>    | Benzo(ghi)perylene                                     | Prediction | -1.495 | -1.362 | 0.133  | 0.323  | 0.110 | 0 | 0 | 29.450 | 2.087 | 0.45           | 0.736 | -79.929 |
| <b>193-39-5</b>    | Indeno 1,2,3-cd pyrene                                 | Prediction | -1.538 | -1.560 | -0.022 | -0.053 | 0.083 | 0 | 0 | 29.487 | 2.087 | 0.45           | 0.820 | -13.214 |
| <b>194-69-4</b>    | Benzo(c)chrysene                                       | Training   | -1.301 | -1.655 | -0.354 | -0.839 | 0.059 | 0 | 0 | 26.325 | 1.945 | 0.45           | 0.542 | -6.220  |
| <b>19780-74-6</b>  | 5-ethyl-1-nonene                                       | Prediction | -0.461 | -1.149 | -0.688 | -1.618 | 0.048 | 0 | 0 | 1.152  | 0.128 | 0.3655<br>1158 | 0.167 | -38.756 |
| <b>20279-21-4</b>  | 1,2,3,10b-Tetrahydrofluoranthene                       | Training   | -1.638 | -1.187 | 0.451  | 1.055  | 0.038 | 0 | 0 | 9.009  | 1.208 | 0.4228<br>5147 | 0.219 | -7.015  |
| <b>204256-07-5</b> | 2,3 Dimethyl-5(4methylpentyl)naphthalene               | Training   | -1.367 | -1.194 | 0.172  | 0.402  | 0.030 | 0 | 0 | 8.907  | 0.808 | 0.4009<br>2998 | 0.514 | -3.379  |
| <b>2050-68-2</b>   | 4,4'-Dichlorobiphenyl                                  | Training   | 0.519  | 0.283  | -0.235 | -0.549 | 0.033 | 1 | 0 | 12.813 | 1.285 | 0.4272<br>2584 | 0.361 | -50.864 |
| <b>2051-24-3</b>   | Decachlorobiphenyl                                     | Training   | 0.319  | 0.392  | 0.073  | 0.177  | 0.107 | 0 | 0 | 11.633 | 1.701 | 0              | 1.139 | -79.929 |
| <b>2051-30-1</b>   | 2,6-Dimethyloctane                                     | Prediction | -1.854 | -0.770 | 1.084  | 2.542  | 0.043 | 0 | 0 | 1.000  | 0.049 | 0              | 0.222 | -3.756  |
| <b>205646-11-3</b> | 1,2,9,10-Tetrachlorodecane                             | Training   | -0.658 | -0.285 | 0.372  | 0.871  | 0.038 | 0 | 0 | 1.000  | 0.677 | 0              | 0.167 | -49.491 |
| <b>206-44-0</b>    | Fluoranthene                                           | Training   | -1.553 | -1.894 | -0.341 | -0.801 | 0.047 | 0 | 0 | 22.751 | 1.503 | 0.45           | 0.219 | -7.015  |
| <b>207-08-9</b>    | Benzo(k)fluoranthene                                   | Prediction | -1.979 | -1.696 | 0.282  | 0.669  | 0.062 | 0 | 0 | 26.583 | 1.845 | 0.45           | 0.594 | -5.116  |
| <b>2136-99-4</b>   | 2,2',3,3',5,5',6,6'-                                   | Prediction | 0.668  | 1.217  | 0.550  | 1.296  | 0.052 | 1 | 0 | 11.451 | 1.759 | 0.3348<br>2506 | 0.917 | -76.246 |

|                    |                                  |            |        |        |        |        |       |   |   |        |       |            |       |         |
|--------------------|----------------------------------|------------|--------|--------|--------|--------|-------|---|---|--------|-------|------------|-------|---------|
|                    | Octachlorobiphenyl               |            |        |        |        |        |       |   |   |        |       |            |       |         |
| <b>214-17-5</b>    | Benzo[b]chrysene                 | Training   | -1.745 | -1.679 | 0.066  | 0.156  | 0.060 | 0 | 0 | 26.594 | 1.945 | 0.45       | 0.528 | -6.755  |
| <b>217-59-4</b>    | Triphenylene                     | Training   | -1.658 | -1.517 | 0.141  | 0.333  | 0.060 | 0 | 0 | 22.798 | 1.603 | 0.45       | 0.375 | -66.126 |
| <b>218-01-9</b>    | Chrysene                         | Training   | -1.538 | -1.577 | -0.039 | -0.093 | 0.063 | 0 | 0 | 23.536 | 1.603 | 0.45       | 0.361 | -64.477 |
| <b>2189-60-8</b>   | n-octylbenzene                   | Prediction | -1.648 | -1.265 | 0.383  | 0.900  | 0.048 | 0 | 0 | 2.788  | 0.553 | 0.41465862 | 0.090 | -2.449  |
| <b>221155-23-3</b> | 1,2,13,14-Tetrachlorotetradecane | Training   | 0.100  | -0.228 | -0.328 | -0.770 | 0.044 | 0 | 0 | 1.000  | 0.677 | 0          | 0.167 | -64.879 |
| <b>22907-72-8</b>  | 1,4-Diisopropylcyclohexane       | Training   | -0.479 | -0.495 | -0.017 | -0.039 | 0.034 | 0 | 0 | 1.000  | 0.121 | 0          | 0.361 | -42.153 |
| <b>23342-25-8</b>  | 2,2,5,7-Tetramethylteraline      | Training   | -1.301 | -0.916 | 0.385  | 0.903  | 0.041 | 0 | 0 | 3.528  | 0.552 | 0.34167092 | 0.535 | -3.084  |
| <b>2381-21-7</b>   | 1-Methylpyrene                   | Training   | -2.301 | -1.853 | 0.448  | 1.055  | 0.049 | 0 | 0 | 23.535 | 1.479 | 0.44609375 | 0.368 | -6.606  |
| <b>243-17-4</b>    | Benzo(b)fluorene                 | Training   | -1.602 | -1.404 | 0.198  | 0.460  | 0.027 | 0 | 0 | 16.747 | 1.463 | 0.44489796 | 0.445 | -5.006  |
| <b>2435-85-0</b>   | Hexadecahydropyrene              | Training   | 0.009  | -0.404 | -0.412 | -0.964 | 0.035 | 0 | 0 | 1.000  | 0.493 | 0          | 0.111 | -54.942 |
| <b>2437-56-1</b>   | 1-Tridecene                      | Training   | -0.963 | -1.177 | -0.214 | -0.505 | 0.050 | 0 | 0 | 1.114  | 0.167 | 0.36977655 | 0.056 | -45.803 |
| <b>2437-79-8</b>   | 2,2',4,4'-Tetrachlorobiphenyl    | Training   | 0.833  | 0.520  | -0.313 | -0.729 | 0.029 | 1 | 0 | 12.168 | 1.475 | 0.39906998 | 0.417 | -55.095 |
| <b>2541-69-7</b>   | 7-Methylbenz(a)anthracene        | Training   | -2.097 | -1.626 | 0.471  | 1.107  | 0.045 | 0 | 0 | 23.021 | 1.579 | 0.44609375 | 0.583 | -6.404  |
| <b>25569-80-6</b>  | 2,3'-Dichlorobiphenyl            | Training   | 0.267  | 0.128  | -0.140 | -0.323 | 0.018 | 1 | 0 | 12.170 | 1.285 | 0.4334064  | 0.333 | -6.032  |
| <b>26186-00-5</b>  | 1-Heptadecyne                    | Training   | -0.086 | -0.577 | -0.491 | -1.149 | 0.037 | 0 | 0 | 1.152  | 0.236 | 0          | 0.056 | -59.027 |
| <b>2732-58-3</b>   | 6-ethylchrysene                  | Training   | -1.495 | -1.496 | -0.001 | -0.003 | 0.046 | 0 | 0 | 22.238 | 1.579 | 0.44300733 | 0.708 | -5.357  |
| <b>27575-78-6</b>  | Tris(4-chlorophenyl)methane      | Training   | 0.538  | 0.989  | 0.451  | 1.075  | 0.072 | 1 | 0 | 8.126  | 1.765 | 0.39707124 | 0.375 | -78.404 |

|                   |                                                                                 |            |        |        |        |        |       |   |   |        |       |                |       |         |
|-------------------|---------------------------------------------------------------------------------|------------|--------|--------|--------|--------|-------|---|---|--------|-------|----------------|-------|---------|
| <b>2974-92-7</b>  | 3,4-Dichlorobiphenyl                                                            | Training   | 0.477  | 0.080  | -0.397 | -0.920 | 0.019 | 1 | 0 | 12.466 | 1.242 | 0.4423<br>167  | 0.361 | -3.075  |
| <b>2980-71-4</b>  | 2-methyl-1-nonene                                                               | Training   | -1.367 | -1.290 | 0.076  | 0.179  | 0.042 | 0 | 0 | 1.164  | 0.143 | 0.3497<br>8029 | 0.111 | -2.769  |
| <b>3010-80-8</b>  | Tris(4-chlorophenyl) methanol                                                   | Training   | -0.260 | 0.639  | 0.898  | 2.101  | 0.037 | 1 | 1 | 7.844  | 2.047 | 0.4433<br>4491 | 0.729 | 0.000   |
| <b>3074-71-3</b>  | 2,3-Dimethylheptane                                                             | Prediction | -0.792 | -0.850 | -0.058 | -0.137 | 0.044 | 0 | 0 | 1.000  | 0.049 | 0              | 0.111 | -1.816  |
| <b>31508-00-6</b> | 2,3',4,4',5-Pentachlorobiphenyl                                                 | Training   | 0.776  | 0.500  | -0.276 | -0.637 | 0.011 | 1 | 0 | 12.328 | 1.56  | 0.3976<br>2022 | 0.611 | -5.396  |
| <b>319-84-6</b>   | (1 alpha,2 alpha,3 beta,4 alpha,5 beta,6 beta)1,2,3,4,5,6-Hexachlorocyclohexane | Training   | -1.516 | -0.252 | 1.264  | 3.011  | 0.072 | 0 | 0 | 1.000  | 0.985 | 0              | 0.000 | -41.666 |
| <b>32598-10-0</b> | 2,3',4,4'-Tetrachlorobiphenyl                                                   | Training   | 0.470  | 0.406  | -0.064 | -0.147 | 0.012 | 1 | 0 | 12.410 | 1.47  | 0.4052<br>5054 | 0.556 | -7.469  |
| <b>32598-11-1</b> | 2,3',4',5-Tetrachlorobiphenyl                                                   | Prediction | 0.771  | 0.408  | -0.363 | -0.839 | 0.011 | 1 | 0 | 12.196 | 1.508 | 0.4032<br>2617 | 0.500 | -7.727  |
| <b>32598-14-4</b> | 2,3,3',4,4'-Pentachlorobiphenyl                                                 | Training   | 0.740  | 0.477  | -0.263 | -0.608 | 0.012 | 1 | 0 | 12.334 | 1.517 | 0.3976<br>2022 | 0.611 | -5.638  |
| <b>32690-93-0</b> | 2,4,4',5-Tetrachlorobiphenyl                                                    | Training   | 0.903  | 0.356  | -0.547 | -1.264 | 0.012 | 1 | 0 | 12.341 | 1.47  | 0.4086<br>0787 | 0.500 | -3.883  |
| <b>32774-16-6</b> | 3,3',4,4',5,5'-Hexachlorobiphenyl                                               | Training   | 0.496  | 0.731  | 0.235  | 0.549  | 0.032 | 1 | 0 | 12.455 | 1.569 | 0.3704<br>563  | 0.583 | -62.383 |
| <b>33025-41-1</b> | 2,3,4,4'-Tetrachlorobiphenyl                                                    | Training   | 0.688  | 0.332  | -0.357 | -0.824 | 0.013 | 1 | 0 | 12.348 | 1.427 | 0.4086<br>0787 | 0.500 | -3.993  |
| <b>3321-50-4</b>  | Cyclohexane, 1,1'-(1,2-                                                         | Training   | -1.301 | -0.463 | 0.838  | 1.952  | 0.029 | 0 | 0 | 1.000  | 0.349 | 0              | 0.181 | -48.355 |

|                   |                                                    |            |        |        |        |        |       |   |   |        |       |                |       |         |
|-------------------|----------------------------------------------------|------------|--------|--------|--------|--------|-------|---|---|--------|-------|----------------|-------|---------|
|                   | EthaneDiyl)Bi<br>s-                                |            |        |        |        |        |       |   |   |        |       |                |       |         |
| <b>3322-93-8</b>  | Tetrabromoeth<br>ylcyclohexane<br>β                | Training   | -0.318 | -0.146 | 0.172  | 0.410  | 0.071 | 0 | 0 | 1.000  | 1.065 | 0              | 0.319 | -2.222  |
| <b>33284-50-3</b> | 2,4-<br>Dichlorobiphe<br>nyl                       | Prediction | 0.703  | 0.041  | -0.663 | -1.537 | 0.021 | 1 | 0 | 12.304 | 1.247 | 0.4410<br>028  | 0.278 | -3.177  |
| <b>33284-52-5</b> | 3,3',5,5'-<br>Tetrachlorobip<br>henyl              | Prediction | 0.457  | 0.496  | 0.039  | 0.090  | 0.031 | 1 | 0 | 12.125 | 1.475 | 0.3932<br>3045 | 0.361 | -55.555 |
| <b>33460-02-5</b> | 3 Phenyl<br>bicyclohexyl                           | Training   | -1.046 | -1.275 | -0.229 | -0.537 | 0.041 | 0 | 0 | 1.124  | 0.143 | 0.3434<br>7806 | 0.111 | -3.938  |
| <b>34883-39-1</b> | 2,5-<br>Dichlorobiphe<br>nyl                       | Prediction | -0.638 | 0.077  | 0.715  | 1.657  | 0.020 | 1 | 0 | 12.078 | 1.285 | 0.4401<br>02   | 0.278 | -3.122  |
| <b>34883-43-7</b> | 2,4'-<br>Dichlorobiphe<br>nyl                      | Prediction | 0.574  | 0.077  | -0.497 | -1.152 | 0.020 | 1 | 0 | 12.335 | 1.285 | 0.4347<br>2029 | 0.278 | -5.408  |
| <b>35065-27-1</b> | 2,2',4,4',5,5'-<br>Hexachlorobip<br>henyl          | Training   | 0.614  | 0.899  | 0.285  | 0.665  | 0.034 | 1 | 0 | 12.085 | 1.655 | 0.3609<br>184  | 0.694 | -65.396 |
| <b>35065-28-2</b> | 2,2',3,4,4',5'-<br>Hexachlorobip<br>henyl          | Training   | 0.803  | 0.638  | -0.165 | -0.382 | 0.012 | 1 | 0 | 12.091 | 1.612 | 0.3804<br>5201 | 0.694 | -9.494  |
| <b>35065-29-3</b> | 2,2',3,4,4',5,5'-<br>Heptachlorobi<br>phenyl       | Training   | 0.842  | 0.767  | -0.075 | -0.173 | 0.016 | 1 | 0 | 12.031 | 1.664 | 0.3532<br>8809 | 0.806 | -5.902  |
| <b>35065-30-6</b> | 2,2',3,3',4,4',5-<br>Heptachlorobi<br>phenyl       | Training   | 0.851  | 0.715  | -0.136 | -0.315 | 0.016 | 1 | 0 | 12.036 | 1.621 | 0.3728<br>217  | 0.806 | -5.703  |
| <b>35693-99-3</b> | 2,2',5,5'-<br>Tetrachlorobip<br>henyl              | Training   | 0.481  | 0.640  | 0.158  | 0.369  | 0.030 | 1 | 0 | 11.865 | 1.551 | 0.3924<br>1253 | 0.472 | -58.779 |
| <b>35694-06-5</b> | 2,2',3,4,4',5-<br>Hexachlorobip<br>henyl           | Training   | 0.836  | 0.629  | -0.206 | -0.477 | 0.014 | 1 | 0 | 12.037 | 1.574 | 0.3853<br>5682 | 0.750 | -4.217  |
| <b>35694-08-7</b> | 2,2',3,3',4,4',5,<br>5'-<br>Octachlorobip<br>henyl | Training   | 0.958  | 1.076  | 0.118  | 0.277  | 0.045 | 1 | 0 | 11.997 | 1.673 | 0.3423<br>0043 | 0.861 | -72.663 |

|                   |                                   |            |        |        |        |        |       |   |   |        |       |                |       |         |
|-------------------|-----------------------------------|------------|--------|--------|--------|--------|-------|---|---|--------|-------|----------------|-------|---------|
| <b>35822-46-9</b> | 1,2,3,4,6,7,8-H7CDD               | Training   | -0.469 | -0.352 | 0.117  | 0.274  | 0.041 | 1 | 4 | 7.351  | 2.332 | 0.4983<br>9695 | 0.799 | -12.460 |
| <b>36559-22-5</b> | 2,2',3,4'-Tetrachlorobiphenyl     | Training   | 0.572  | 0.369  | -0.203 | -0.469 | 0.012 | 1 | 0 | 12.064 | 1.47  | 0.4099<br>2177 | 0.472 | -8.219  |
| <b>37680-65-2</b> | 2,2',5-Trichlorobiphenyl          | Training   | 0.580  | 0.239  | -0.341 | -0.788 | 0.015 | 1 | 0 | 11.910 | 1.418 | 0.4257<br>7608 | 0.361 | -4.155  |
| <b>37680-66-3</b> | 2,2',4-Trichlorobiphenyl          | Training   | 0.204  | 0.171  | -0.033 | -0.077 | 0.017 | 1 | 0 | 12.058 | 1.38  | 0.4270<br>8998 | 0.306 | -4.197  |
| <b>37680-73-2</b> | 2,2',4,5,5'-Pentachlorobiphenyl   | Training   | 0.783  | 0.539  | -0.244 | -0.563 | 0.012 | 1 | 0 | 11.961 | 1.603 | 0.3890<br>2128 | 0.583 | -5.018  |
| <b>38379-99-6</b> | 2,2',3,5',6-Pentachlorobiphenyl   | Training   | 0.734  | 0.542  | -0.192 | -0.443 | 0.012 | 1 | 0 | 11.670 | 1.603 | 0.3868<br>0658 | 0.556 | -5.258  |
| <b>38380-01-7</b> | 2,2',4,4',5-Pentachlorobiphenyl   | Training   | 0.868  | 0.505  | -0.363 | -0.838 | 0.011 | 1 | 0 | 12.115 | 1.565 | 0.3914<br>3966 | 0.583 | -5.030  |
| <b>38380-02-8</b> | 2,2',3,4,5'-Pentachlorobiphenyl   | Prediction | 0.760  | 0.515  | -0.244 | -0.564 | 0.011 | 1 | 0 | 11.968 | 1.56  | 0.3890<br>2128 | 0.583 | -5.198  |
| <b>38380-03-9</b> | 2,3,3',4',6-Pentachlorobiphenyl   | Prediction | 0.919  | 0.514  | -0.405 | -0.934 | 0.011 | 1 | 0 | 11.940 | 1.56  | 0.3922<br>3851 | 0.583 | -5.687  |
| <b>38380-04-0</b> | 2,2',3,4',5',6-Hexachlorobiphenyl | Training   | 0.792  | 0.669  | -0.123 | -0.285 | 0.012 | 1 | 0 | 11.757 | 1.655 | 0.3737<br>9456 | 0.667 | -8.553  |
| <b>38380-05-1</b> | 2,2',3,3',4,6'-Hexachlorobiphenyl | Prediction | 0.743  | 0.649  | -0.094 | -0.217 | 0.012 | 1 | 0 | 11.763 | 1.612 | 0.3750<br>703  | 0.667 | -10.083 |
| <b>38380-07-3</b> | 2,2',3,3',4,4'-Hexachlorobiphenyl | Training   | 0.769  | 0.812  | 0.043  | 0.099  | 0.032 | 1 | 0 | 12.096 | 1.569 | 0.3804<br>5201 | 0.694 | -62.440 |
| <b>38380-08-4</b> | 2,3,3',4,4',5-Hexachlorobiphenyl  | Training   | 0.869  | 0.555  | -0.314 | -0.726 | 0.012 | 1 | 0 | 12.228 | 1.569 | 0.3899<br>899  | 0.667 | -4.434  |
| <b>38411-22-2</b> | 2,2',3,3',6,6'-Hexachlorobiphenyl | Training   | 0.678  | 0.882  | 0.204  | 0.477  | 0.034 | 1 | 0 | 11.520 | 1.655 | 0.3704<br>563  | 0.639 | -65.119 |

|                   |                                              |            |        |        |        |        |       |   |   |        |       |                |       |         |
|-------------------|----------------------------------------------|------------|--------|--------|--------|--------|-------|---|---|--------|-------|----------------|-------|---------|
| <b>38411-25-5</b> | 2,2',3,3',4,5,6'-<br>Heptachlorobi<br>phenyl | Training   | 0.830  | 0.784  | -0.047 | -0.108 | 0.017 | 1 | 0 | 11.693 | 1.664 | 0.3681<br>8861 | 0.833 | -5.512  |
| <b>38444-73-4</b> | 2,2',6-<br>Trichlorobiphe<br>nyl             | Training   | 0.568  | 0.141  | -0.428 | -0.992 | 0.021 | 1 | 0 | 11.754 | 1.38  | 0.4237<br>5172 | 0.222 | -4.450  |
| <b>38444-76-7</b> | 2,3',6-<br>Trichlorobiphe<br>nyl             | Prediction | -0.046 | 0.268  | 0.313  | 0.724  | 0.014 | 1 | 0 | 11.928 | 1.38  | 0.4175<br>7116 | 0.417 | -4.920  |
| <b>38444-77-8</b> | 2,4',6-<br>Trichlorobiphe<br>nyl             | Training   | 0.580  | 0.198  | -0.382 | -0.884 | 0.017 | 1 | 0 | 12.022 | 1.38  | 0.4122<br>7233 | 0.306 | -5.303  |
| <b>38444-78-9</b> | 2,2',3-<br>Trichlorobiphe<br>nyl             | Prediction | 0.477  | 0.215  | -0.262 | -0.605 | 0.015 | 1 | 0 | 11.918 | 1.375 | 0.4257<br>7608 | 0.361 | -4.326  |
| <b>38444-81-4</b> | 2,3',5-<br>Trichlorobiphe<br>nyl             | Training   | 0.653  | 0.257  | -0.396 | -0.916 | 0.014 | 1 | 0 | 12.065 | 1.418 | 0.4203<br>9438 | 0.389 | -4.529  |
| <b>38444-84-7</b> | 2,3,3'-<br>Trichlorobiphe<br>nyl             | Training   | -0.222 | 0.233  | 0.455  | 1.052  | 0.014 | 1 | 0 | 12.073 | 1.375 | 0.4203<br>9438 | 0.389 | -4.765  |
| <b>38444-85-8</b> | 2,3,4'-<br>Trichlorobiphe<br>nyl             | Training   | 0.352  | 0.226  | -0.127 | -0.293 | 0.015 | 1 | 0 | 12.285 | 1.375 | 0.4175<br>5208 | 0.389 | -5.108  |
| <b>38444-86-9</b> | 2,3',4'-<br>Trichlorobiphe<br>nyl            | Training   | 0.519  | 0.246  | -0.273 | -0.630 | 0.014 | 1 | 0 | 12.218 | 1.375 | 0.4291<br>1435 | 0.444 | -4.005  |
| <b>38444-93-8</b> | 2,2',3,3'-<br>Tetrachlorobip<br>henyl        | Training   | 0.514  | 0.555  | 0.041  | 0.095  | 0.028 | 1 | 0 | 11.880 | 1.465 | 0.4086<br>0787 | 0.472 | -55.177 |
| <b>3891-98-3</b>  | 2,6,10-<br>Trimethyl<br>dodecane             | Training   | -0.002 | -0.672 | -0.670 | -1.576 | 0.047 | 0 | 0 | 1.000  | 0.01  | 0              | 0.389 | -6.604  |
| <b>39227-61-7</b> | 1,2,3,4,7-<br>P5CDD                          | Training   | -1.092 | -0.545 | 0.547  | 1.285  | 0.046 | 1 | 4 | 7.391  | 2.309 | 0.5399<br>0586 | 0.653 | -6.003  |
| <b>39635-31-9</b> | 2,3,3',4,4',5,5'-<br>Heptachlorobi<br>phenyl | Prediction | 0.631  | 0.671  | 0.040  | 0.092  | 0.014 | 1 | 0 | 12.203 | 1.621 | 0.3594<br>6864 | 0.722 | -6.158  |
| <b>40186-70-7</b> | 2,2',3,3',4,5',6-<br>Heptachlorobi<br>phenyl | Training   | 0.778  | 0.801  | 0.022  | 0.052  | 0.017 | 1 | 0 | 11.765 | 1.669 | 0.3561<br>113  | 0.833 | -5.977  |

|                   |                                                                    |            |        |        |        |        |       |   |   |        |       |                |       |         |
|-------------------|--------------------------------------------------------------------|------------|--------|--------|--------|--------|-------|---|---|--------|-------|----------------|-------|---------|
| <b>40186-71-8</b> | 2,2',3,3',4,5',6,6'-Octachlorobiphenyl                             | Training   | 0.803  | 0.948  | 0.145  | 0.338  | 0.021 | 1 | 0 | 11.587 | 1.721 | 0.3357<br>2586 | 0.917 | -12.645 |
| <b>40186-72-9</b> | 2,2',3,3',4,4',5,5',6-Nonachlorobiphenyl                           | Training   | 0.532  | 0.955  | 0.423  | 0.985  | 0.027 | 1 | 0 | 11.797 | 1.687 | 0.3313<br>1278 | 1.000 | -6.678  |
| <b>40458-98-8</b> | 2,7-Diisopropyl naphthalene                                        | Prediction | -1.438 | -1.025 | 0.413  | 0.968  | 0.041 | 0 | 0 | 9.992  | 0.793 | 0.3972<br>2647 | 0.583 | -54.871 |
| <b>41411-64-7</b> | 2,3,3',4,4',5,6-Heptachlorobiphenyl                                | Training   | 0.894  | 0.648  | -0.246 | -0.569 | 0.014 | 1 | 0 | 11.947 | 1.583 | 0.3790<br>0225 | 0.750 | -3.931  |
| <b>41464-39-5</b> | 2,2',3,5'-Tetrachlorobiphenyl                                      | Prediction | 0.789  | 0.403  | -0.386 | -0.891 | 0.012 | 1 | 0 | 11.873 | 1.508 | 0.4086<br>0787 | 0.472 | -8.059  |
| <b>41464-41-9</b> | 2,2',5,6'-Tetrachlorobiphenyl                                      | Training   | -0.398 | 0.397  | 0.795  | 1.835  | 0.012 | 1 | 0 | 11.729 | 1.513 | 0.4057<br>6558 | 0.444 | -7.135  |
| <b>41464-43-1</b> | 2,3,3',4'-Tetrachlorobiphenyl                                      | Training   | 0.668  | 0.367  | -0.300 | -0.693 | 0.012 | 1 | 0 | 12.203 | 1.465 | 0.4119<br>4614 | 0.500 | -6.728  |
| <b>41464-46-4</b> | 2,3',4',6-Tetrachlorobiphenyl                                      | Prediction | 0.322  | 0.406  | 0.084  | 0.194  | 0.011 | 1 | 0 | 11.972 | 1.47  | 0.4079<br>8028 | 0.528 | -6.252  |
| <b>41464-47-5</b> | 2,2',3,6'-Tetrachlorobiphenyl                                      | Training   | -0.398 | 0.376  | 0.774  | 1.787  | 0.012 | 1 | 0 | 11.736 | 1.47  | 0.4065<br>8351 | 0.444 | -8.388  |
| <b>41464-49-7</b> | 2,3,3',5'-Tetrachlorobiphenyl                                      | Training   | 0.238  | 0.384  | 0.146  | 0.338  | 0.012 | 1 | 0 | 12.010 | 1.47  | 0.4106<br>3224 | 0.500 | -6.875  |
| <b>41464-51-1</b> | 2,2',3',4,5-Pentachlorobiphenyl                                    | Training   | 0.842  | 0.493  | -0.349 | -0.807 | 0.011 | 1 | 0 | 11.968 | 1.56  | 0.4043<br>1582 | 0.583 | -4.824  |
| <b>4175-54-6</b>  | 1,2,3,4-Tetrahydro-1,4-Dimethylnaphthalene (1,4-Dimethyl Tetralin) | Training   | -0.801 | -1.079 | -0.277 | -0.651 | 0.042 | 0 | 0 | 3.479  | 0.601 | 0.3904<br>8611 | 0.125 | -41.263 |



|            |                                                                          |            |        |        |        |        |       |   |   |        |       |                |       |         |
|------------|--------------------------------------------------------------------------|------------|--------|--------|--------|--------|-------|---|---|--------|-------|----------------|-------|---------|
| 42740-50-1 | 2,2',3,3',4,4',5,6'-Octachlorobiphenyl                                   | Prediction | 0.833  | 0.915  | 0.083  | 0.192  | 0.023 | 1 | 0 | 11.840 | 1.678 | 0.3389<br>4309 | 0.944 | -10.628 |
| 4292-75-5  | n-hexyl cyclohexane                                                      | Prediction | -1.377 | -0.758 | 0.619  | 1.451  | 0.040 | 0 | 0 | 1.000  | 0.238 | 0              | 0.090 | -2.103  |
| 43121-43-3 | Triadimefon                                                              | Prediction | -1.921 | -2.403 | -0.482 | -1.218 | 0.174 | 1 | 8 | 4.411  | 1.789 | 0.7449<br>3308 | 0.871 | -2.373  |
| 4316-65-8  | 3,5,5'-Trimethyl hexene                                                  | Training   | -1.201 | -1.433 | -0.232 | -0.545 | 0.046 | 0 | 0 | 1.178  | 0.049 | 0.3601<br>3889 | 0.000 | -2.286  |
| 438-22-2   | 5 $\alpha$ (H)-androstane                                                | Training   | -0.172 | -0.271 | -0.099 | -0.232 | 0.047 | 0 | 0 | 1.000  | 0.413 | 0              | 0.667 | -5.322  |
| 475-03-6   | 1,1,6-Trimethyl Tetralin                                                 | Training   | -0.484 | -1.064 | -0.580 | -1.356 | 0.035 | 0 | 0 | 3.480  | 0.576 | 0.3596<br>5278 | 0.319 | -3.409  |
| 483-65-8   | 1-methyl-7-(1methylethyl)-phenanthrene                                   | Training   | -1.553 | -1.488 | 0.065  | 0.151  | 0.031 | 0 | 0 | 17.081 | 1.174 | 0.4270<br>8546 | 0.563 | -3.852  |
| 488-23-3   | 1,2,3,4-Tetramethyl benzene                                              | Prediction | -1.292 | -1.250 | 0.042  | 0.099  | 0.038 | 0 | 0 | 3.537  | 0.481 | 0.3809<br>7222 | 0.000 | -32.642 |
| 4920-95-0  | 3,3',4,4'-Tetramethyl 1,1'-biphenyl                                      | Training   | -2.046 | -1.153 | 0.893  | 2.090  | 0.039 | 0 | 0 | 12.631 | 0.923 | 0.4123<br>2852 | 0.528 | -59.239 |
| 496-10-6   | Bicyclo[4.3.0]nonane                                                     | Prediction | -1.102 | -0.646 | 0.457  | 1.068  | 0.035 | 0 | 0 | 1.000  | 0.349 | 0              | 0.000 | -31.250 |
| 50-29-3    | 4,4'-DDT                                                                 | Training   | 0.752  | 1.045  | 0.293  | 0.689  | 0.047 | 1 | 0 | 5.938  | 1.448 | 0.3675<br>7154 | 0.528 | -67.420 |
| 50-32-8    | Benzo[a]pyrene                                                           | Training   | -1.745 | -1.876 | -0.131 | -0.312 | 0.067 | 0 | 0 | 27.149 | 1.845 | 0.45           | 0.375 | -4.691  |
| 50876-32-9 | cis 1,1,3,5-Tetramethyl cyclohexane                                      | Training   | -0.265 | -0.881 | -0.616 | -1.446 | 0.045 | 0 | 0 | 1.000  | 0.12  | 0              | 0.000 | -2.468  |
| 5103-74-2  | 1,2,4,5,6,7,8,8-Octachloro-2,3,3a,4,7,7a-Hexahydro-4,7-methano-1H-indene | Training   | 0.326  | 0.360  | 0.034  | 0.082  | 0.105 | 0 | 0 | 1.401  | 1.442 | 0              | 0.768 | -9.294  |

|                   |                                       |            |        |        |        |        |       |   |   |        |       |                |       |         |
|-------------------|---------------------------------------|------------|--------|--------|--------|--------|-------|---|---|--------|-------|----------------|-------|---------|
| <b>51655-65-3</b> | 2-butyl-1-decene                      | Prediction | -0.975 | -1.237 | -0.262 | -0.612 | 0.037 | 0 | 0 | 1.127  | 0.143 | 0.3147<br>1085 | 0.111 | -3.544  |
| <b>51908-16-8</b> | 2,2',3,4',5,5'-Hexachlorobiphenyl     | Training   | 0.917  | 0.697  | -0.219 | -0.507 | 0.013 | 1 | 0 | 11.950 | 1.655 | 0.3670<br>9896 | 0.694 | -11.751 |
| <b>52663-58-8</b> | 2,3,4',6-Tetrachlorobiphenyl          | Prediction | 0.806  | 0.332  | -0.474 | -1.096 | 0.013 | 1 | 0 | 11.962 | 1.47  | 0.4032<br>2617 | 0.417 | -3.967  |
| <b>52663-59-9</b> | 2,2',3,4-Tetrachlorobiphenyl          | Training   | 0.218  | 0.319  | 0.101  | 0.234  | 0.012 | 1 | 0 | 11.940 | 1.427 | 0.4214<br>8403 | 0.472 | -3.564  |
| <b>52663-60-2</b> | 2,2',3,3',6-Pentachlorobiphenyl       | Prediction | 0.505  | 0.498  | -0.008 | -0.018 | 0.011 | 1 | 0 | 11.676 | 1.56  | 0.4009<br>7756 | 0.556 | -5.044  |
| <b>52663-61-3</b> | 2,2',3,5,5'-Pentachlorobiphenyl       | Training   | 0.744  | 0.551  | -0.194 | -0.448 | 0.012 | 1 | 0 | 11.793 | 1.603 | 0.3881<br>2048 | 0.583 | -5.038  |
| <b>52663-62-4</b> | 2,2',3,3',4-Pentachlorobiphenyl       | Training   | 0.738  | 0.469  | -0.269 | -0.621 | 0.011 | 1 | 0 | 11.974 | 1.517 | 0.4043<br>1582 | 0.583 | -4.983  |
| <b>52663-65-7</b> | 2,2',3,3',4,6,6'-Heptachlorobiphenyl  | Training   | 0.767  | 0.742  | -0.025 | -0.058 | 0.015 | 1 | 0 | 11.580 | 1.669 | 0.3662<br>4712 | 0.750 | -5.659  |
| <b>52663-66-8</b> | 2,2',3,3',4,5'-Hexachlorobiphenyl     | Training   | 0.431  | 0.651  | 0.220  | 0.507  | 0.012 | 1 | 0 | 11.956 | 1.612 | 0.3784<br>2764 | 0.694 | -10.120 |
| <b>52663-68-0</b> | 2,2',3,4',5,5',6-Heptachlorobiphenyl  | Training   | 0.756  | 0.799  | 0.043  | 0.099  | 0.016 | 1 | 0 | 11.731 | 1.707 | 0.3479<br>0638 | 0.778 | -5.960  |
| <b>52663-69-1</b> | 2,2',3,4,4',5',6-Heptachlorobiphenyl  | Training   | 0.790  | 0.768  | -0.022 | -0.052 | 0.016 | 1 | 0 | 11.856 | 1.669 | 0.3499<br>3075 | 0.778 | -6.091  |
| <b>52663-70-4</b> | 2,2',3,3',4,5',6'-Heptachlorobiphenyl | Training   | 0.796  | 0.747  | -0.049 | -0.114 | 0.015 | 1 | 0 | 11.736 | 1.664 | 0.3674<br>3999 | 0.778 | -5.760  |
| <b>52663-71-5</b> | 2,2',3,3',4,4',6-Heptachlorobiphenyl  | Training   | 0.848  | 0.716  | -0.133 | -0.307 | 0.015 | 1 | 0 | 11.861 | 1.626 | 0.3694<br>6436 | 0.778 | -5.876  |

|                   |                                          |            |        |        |        |        |       |   |   |        |       |                |       |         |
|-------------------|------------------------------------------|------------|--------|--------|--------|--------|-------|---|---|--------|-------|----------------|-------|---------|
| <b>52663-72-6</b> | 2,3',4,4',5,5'-Hexachlorobiphenyl        | Prediction | 0.732  | 0.663  | -0.069 | -0.159 | 0.013 | 1 | 0 | 12.277 | 1.612 | 0.3670<br>9896 | 0.722 | -9.615  |
| <b>52663-74-8</b> | 2,2',3,3',4,5,5'-Heptachlorobiphenyl     | Training   | 0.854  | 0.732  | -0.122 | -0.283 | 0.015 | 1 | 0 | 11.865 | 1.664 | 0.3594<br>6864 | 0.750 | -5.806  |
| <b>52663-75-9</b> | 2,2',3,3',4,5,5',6'-Octachlorobiphenyl   | Training   | 0.820  | 0.916  | 0.096  | 0.223  | 0.020 | 1 | 0 | 11.688 | 1.716 | 0.3370<br>3975 | 0.889 | -11.709 |
| <b>52663-77-1</b> | 2,2',3,3',4,5,5',6,6'-Nonachlorobiphenyl | Training   | 0.728  | 1.012  | 0.284  | 0.661  | 0.029 | 1 | 0 | 11.531 | 1.73  | 0.3314<br>3381 | 1.028 | -6.465  |
| <b>52663-78-2</b> | 2,2',3,3',4,4',5,6-Octachlorobiphenyl    | Training   | 0.641  | 0.804  | 0.163  | 0.377  | 0.020 | 1 | 0 | 11.799 | 1.635 | 0.3618<br>3404 | 0.889 | -4.784  |
| <b>52663-79-3</b> | 2,2',3,3',4,4',5,6,6'-Nonachlorobiphenyl | Prediction | 0.799  | 0.986  | 0.187  | 0.435  | 0.029 | 1 | 0 | 11.644 | 1.692 | 0.3300<br>3704 | 1.028 | -6.416  |
| <b>526-73-8</b>   | 1,3,5-Trimethylbenzene                   | Training   | -1.602 | -1.383 | 0.219  | 0.514  | 0.044 | 0 | 0 | 3.524  | 0.505 | 0.4087<br>5    | 0.000 | -3.688  |
| <b>52712-04-6</b> | 2,2',3,4,5,5'-Hexachlorobiphenyl         | Training   | 0.839  | 0.626  | -0.213 | -0.491 | 0.013 | 1 | 0 | 11.852 | 1.612 | 0.3847<br>2923 | 0.694 | -4.190  |
| <b>52712-05-7</b> | 2,2',3,4,5,5',6-Heptachlorobiphenyl      | Prediction | 0.845  | 0.708  | -0.137 | -0.316 | 0.015 | 1 | 0 | 11.624 | 1.626 | 0.3791<br>2328 | 0.778 | -3.730  |
| <b>52744-13-5</b> | 2,2',3,3',5,6'-Hexachlorobiphenyl        | Training   | 0.724  | 0.716  | -0.008 | -0.019 | 0.013 | 1 | 0 | 11.642 | 1.655 | 0.3724<br>8067 | 0.722 | -8.942  |
| <b>52886-35-8</b> | 3-methyl-1-hexylcyclohexane              | Training   | -1.181 | -0.740 | 0.440  | 1.031  | 0.039 | 0 | 0 | 1.000  | 0.199 | 0              | 0.146 | -2.835  |
| <b>53-19-0</b>    | o,p'-DDD                                 | Training   | 0.380  | 0.712  | 0.331  | 0.770  | 0.025 | 1 | 0 | 6.040  | 1.431 | 0.4019<br>2854 | 0.472 | -5.118  |
| <b>5325-97-3</b>  | 1,2,3,4,5,6,7,8-                         | Training   | -0.893 | -1.045 | -0.152 | -0.357 | 0.039 | 0 | 0 | 3.470  | 0.781 | 0.3384<br>0278 | 0.125 | -3.984  |

|                   |                                  |            |        |        |        |        |       |   |   |        |       |            |       |         |
|-------------------|----------------------------------|------------|--------|--------|--------|--------|-------|---|---|--------|-------|------------|-------|---------|
|                   | octahydrophenanthrene            |            |        |        |        |        |       |   |   |        |       |            |       |         |
| <b>53-70-3</b>    | Dibenzo[a,h]anthracene           | Training   | -2.155 | -1.680 | 0.475  | 1.124  | 0.060 | 0 | 0 | 26.582 | 1.945 | 0.45       | 0.528 | -6.205  |
| <b>541-02-6</b>   | Decamethylcyclopentasiloxane     | Training   | 0.532  | 0.847  | 0.316  | 0.858  | 0.287 | 0 | 0 | 1.000  | 0.452 | 0          | 1.944 | -74.624 |
| <b>544-76-3</b>   | n-Hexadecane                     | Prediction | -0.314 | -0.641 | -0.327 | -0.765 | 0.038 | 0 | 0 | 1.000  | 0.127 | 0          | 0.056 | -55.784 |
| <b>55215-18-4</b> | 2,2',3,3',4,5-Hexachlorobiphenyl | Prediction | 0.839  | 0.582  | -0.257 | -0.593 | 0.013 | 1 | 0 | 11.857 | 1.569 | 0.39870988 | 0.694 | -4.081  |
| <b>556-67-2</b>   | Octamethylcycloctetrasiloxane    | Prediction | 0.602  | 0.105  | -0.497 | -1.181 | 0.068 | 0 | 0 | 1.000  | 0.417 | 0          | 0.944 | -56.561 |
| <b>55702-45-9</b> | 2,3,6-Trichlorobiphenyl          | Training   | 0.470  | 0.149  | -0.321 | -0.743 | 0.017 | 1 | 0 | 11.773 | 1.337 | 0.43449606 | 0.306 | -2.839  |
| <b>55712-37-3</b> | 2,3',4-Trichlorobiphenyl         | Prediction | 0.556  | 0.254  | -0.303 | -0.700 | 0.014 | 1 | 0 | 12.329 | 1.38  | 0.42241875 | 0.444 | -4.609  |
| <b>5617-41-4</b>  | n-heptylcyclohexane              | Training   | -1.699 | -0.757 | 0.942  | 2.207  | 0.040 | 0 | 0 | 1.000  | 0.238 | 0          | 0.090 | -2.265  |
| <b>56-49-5</b>    | 3-methylcholanthrene             | Training   | -1.523 | -1.331 | 0.192  | 0.449  | 0.033 | 0 | 0 | 19.474 | 1.681 | 0.44094122 | 0.601 | -7.639  |
| <b>56-55-3</b>    | Benzo[a]anthracene               | Training   | -2.301 | -1.815 | 0.487  | 1.144  | 0.048 | 0 | 0 | 23.672 | 1.603 | 0.45       | 0.347 | -5.702  |
| <b>56558-16-8</b> | 2,2',4,6,6'-Pentachlorobiphenyl  | Training   | 0.393  | 0.358  | -0.035 | -0.080 | 0.015 | 1 | 0 | 11.606 | 1.532 | 0.40106044 | 0.361 | -4.858  |
| <b>5707-44-8</b>  | 4-ethyl-1,1'-biphenyl            | Prediction | -1.745 | -1.489 | 0.256  | 0.594  | 0.024 | 0 | 0 | 12.296 | 0.995 | 0.44441358 | 0.313 | -3.010  |
| <b>57465-28-8</b> | 3,3',4,4',5-Pentachlorobiphenyl  | Training   | 0.581  | 0.441  | -0.140 | -0.323 | 0.012 | 1 | 0 | 12.527 | 1.517 | 0.40097756 | 0.583 | -5.242  |
| <b>581-40-8</b>   | 2,3-Dimethylnaphthalene          | Training   | -1.921 | -1.397 | 0.523  | 1.220  | 0.030 | 0 | 0 | 10.705 | 0.871 | 0.43795352 | 0.167 | -43.252 |
| <b>60145-20-2</b> | 2,2',3,3',5-Pentachlorobiphenyl  | Training   | 0.761  | 0.505  | -0.256 | -0.592 | 0.011 | 1 | 0 | 11.799 | 1.56  | 0.40300193 | 0.583 | -4.843  |

|                   |                                                      |            |        |        |        |        |       |   |   |        |       |                |       |         |
|-------------------|------------------------------------------------------|------------|--------|--------|--------|--------|-------|---|---|--------|-------|----------------|-------|---------|
| <b>60145-23-5</b> | 2,2',3,4,4',5,6'-Heptachlorobiphenyl                 | Training   | 0.836  | 0.810  | -0.025 | -0.059 | 0.020 | 1 | 0 | 11.858 | 1.631 | 0.3548<br>3556 | 0.889 | -5.555  |
| <b>60233-25-2</b> | 2,2',3,4',6'-Pentachlorobiphenyl                     | Training   | 0.230  | 0.467  | 0.237  | 0.547  | 0.011 | 1 | 0 | 11.843 | 1.527 | 0.4022<br>9145 | 0.556 | -5.057  |
| <b>608-93-5</b>   | Pentachlorobenzene                                   | Training   | -0.387 | 0.473  | 0.860  | 2.019  | 0.043 | 1 | 0 | 3.548  | 0.918 | 0.3436<br>334  | 0.000 | -38.270 |
| <b>6117-97-1</b>  | 4-methyl dodecane                                    | Training   | -1.114 | -0.824 | 0.290  | 0.680  | 0.042 | 0 | 0 | 1.000  | 0.088 | 0              | 0.111 | -3.143  |
| <b>62338-09-4</b> | 2,2,3-Trimethyl decane                               | Prediction | -1.181 | -0.799 | 0.382  | 0.896  | 0.046 | 0 | 0 | 1.000  | 0.009 | 0              | 0.222 | -2.035  |
| <b>629-50-5</b>   | n-Tridecane                                          | Training   | -0.569 | -0.678 | -0.110 | -0.256 | 0.035 | 0 | 0 | 1.000  | 0.127 | 0              | 0.056 | -45.803 |
| <b>629-59-4</b>   | n-Tetradecane                                        | Training   | 0.029  | -0.661 | -0.690 | -1.614 | 0.036 | 0 | 0 | 1.000  | 0.127 | 0              | 0.056 | -50.461 |
| <b>629-73-2</b>   | 1-Hexadecene                                         | Training   | 0.183  | -1.133 | -1.316 | -3.108 | 0.055 | 0 | 0 | 1.083  | 0.167 | 0.3664<br>1337 | 0.056 | -55.784 |
| <b>66246-88-6</b> | 1H-1,2,4-Triazole, 1-[2-(2,4-Dichlorophenyl)pentyl]- | Training   | -2.000 | -1.541 | 0.459  | 1.105  | 0.092 | 1 | 5 | 4.617  | 1.307 | 0.6791<br>6108 | 0.569 | -16.746 |
| <b>67129-08-2</b> | Metazachlor                                          | Training   | -4.494 | -3.203 | 1.291  | 3.119  | 0.098 | 0 | 7 | 4.692  | 2     | 0.6003<br>5435 | 0.715 | -4.971  |
| <b>68194-04-7</b> | 2,2',4,6'-Tetrachlorobiphenyl                        | Training   | -0.854 | 0.296  | 1.150  | 2.661  | 0.015 | 1 | 0 | 11.814 | 1.475 | 0.4066<br>6638 | 0.333 | -7.174  |
| <b>68194-05-8</b> | 2,2',3,4',6-Pentachlorobiphenyl                      | Training   | 0.303  | 0.476  | 0.173  | 0.399  | 0.012 | 1 | 0 | 11.801 | 1.565 | 0.3876<br>2451 | 0.500 | -5.282  |
| <b>68194-14-9</b> | 2,2',3,4,5',6-Hexachlorobiphenyl                     | Training   | 0.799  | 0.620  | -0.180 | -0.415 | 0.013 | 1 | 0 | 11.739 | 1.617 | 0.3834<br>1533 | 0.667 | -4.254  |
| <b>68194-15-0</b> | 2,2',3,4,5,6'-Hexachlorobiphenyl                     | Training   | -0.523 | 0.652  | 1.175  | 2.717  | 0.015 | 1 | 0 | 11.659 | 1.574 | 0.3980<br>8228 | 0.778 | -3.961  |
| <b>68194-16-1</b> | 2,2',3,3',4,5,6-Heptachlorobiphenyl                  | Prediction | 0.009  | 0.667  | 0.659  | 1.524  | 0.015 | 1 | 0 | 11.629 | 1.583 | 0.3910<br>7956 | 0.778 | -3.653  |
| <b>6975-98-0</b>  | 2-methyl decane                                      | Training   | -1.444 | -0.824 | 0.620  | 1.455  | 0.042 | 0 | 0 | 1.000  | 0.088 | 0              | 0.111 | -3.142  |

|                   |                                                             |            |        |        |        |        |       |   |   |        |       |                |       |         |
|-------------------|-------------------------------------------------------------|------------|--------|--------|--------|--------|-------|---|---|--------|-------|----------------|-------|---------|
| <b>7012-37-5</b>  | 2,4,4'-Trichlorobiphenyl                                    | Prediction | 0.290  | 0.220  | -0.071 | -0.163 | 0.015 | 1 | 0 | 12.452 | 1.38  | 0.4162<br>3819 | 0.389 | -4.923  |
| <b>702-79-4</b>   | 1,3-Dimethyladamantane                                      | Training   | -1.174 | -0.599 | 0.575  | 1.344  | 0.036 | 0 | 0 | 1.000  | 0.341 | 0              | 0.000 | -44.862 |
| <b>70356-09-1</b> | 1-(4-tert-butylphenyl)-3-(4-methoxyphenyl)propane-1,3-Dione | Training   | -0.914 | -1.736 | -0.821 | -1.970 | 0.084 | 0 | 4 | 4.621  | 1.979 | 0.5608<br>4205 | 1.056 | -5.420  |
| <b>70362-45-7</b> | 2,2',3,6-Tetrachlorobiphenyl                                | Training   | 0.568  | 0.310  | -0.259 | -0.598 | 0.014 | 1 | 0 | 11.664 | 1.47  | 0.4181<br>4577 | 0.389 | -3.566  |
| <b>70362-46-8</b> | 2,2',3,5-Tetrachlorobiphenyl                                | Prediction | 0.829  | 0.389  | -0.440 | -1.017 | 0.012 | 1 | 0 | 11.804 | 1.47  | 0.4201<br>7014 | 0.528 | -3.482  |
| <b>70424-68-9</b> | 2,3,3',4',5-Pentachlorobiphenyl                             | Training   | 1.033  | 0.478  | -0.555 | -1.282 | 0.011 | 1 | 0 | 12.140 | 1.56  | 0.3955<br>9585 | 0.556 | -5.400  |
| <b>70424-70-3</b> | 2,3',4',5,5'-Pentachlorobiphenyl                            | Prediction | 0.380  | 0.523  | 0.143  | 0.330  | 0.012 | 1 | 0 | 12.087 | 1.56  | 0.3903<br>3517 | 0.611 | -4.903  |
| <b>7045-71-8</b>  | 2-methylundecane                                            | Training   | -1.292 | -0.822 | 0.470  | 1.103  | 0.042 | 0 | 0 | 1.000  | 0.088 | 0              | 0.111 | -3.532  |
| <b>7116-96-3</b>  | 4-pentyl-1,1'-Biphenyl                                      | Training   | -1.174 | -1.370 | -0.196 | -0.456 | 0.026 | 0 | 0 | 10.753 | 0.995 | 0.4391<br>3206 | 0.340 | -3.036  |
| <b>71608-00-9</b> | 1-octylpyrene                                               | Training   | -1.108 | -1.568 | -0.460 | -1.074 | 0.033 | 0 | 0 | 20.215 | 1.479 | 0.4328<br>3919 | 0.486 | -3.439  |
| <b>717-74-8</b>   | Benzene, 1,3,5-Tris(1-methylethyl)-                         | Prediction | -0.398 | -0.433 | -0.035 | -0.085 | 0.103 | 0 | 0 | 3.407  | 0.388 | 0.3080<br>5556 | 1.042 | -53.426 |
| <b>71888-89-6</b> | Diisooheptyl phthalate                                      | Training   | -2.509 | -2.726 | -0.217 | -0.528 | 0.107 | 0 | 6 | 3.096  | 1.313 | 0.5696<br>6446 | 0.694 | -94.461 |
| <b>72-43-5</b>    | Methoxy chlor                                               | Training   | -0.969 | -1.961 | -0.992 | -2.332 | 0.047 | 0 | 4 | 5.764  | 1.504 | 0.4759<br>5165 | 0.653 | -73.385 |
| <b>72-54-8</b>    | p,p'-DDD                                                    | Training   | 0.602  | 0.956  | 0.354  | 0.829  | 0.042 | 1 | 0 | 6.173  | 1.431 | 0.3752<br>0186 | 0.472 | -62.499 |

|                   |                                               |            |        |        |        |        |       |   |   |        |       |                |       |         |
|-------------------|-----------------------------------------------|------------|--------|--------|--------|--------|-------|---|---|--------|-------|----------------|-------|---------|
| <b>73575-52-7</b> | 2,3',4,5'-<br>Tetrachlorobiphenyl             | Prediction | 0.218  | 0.460  | 0.242  | 0.559  | 0.012 | 1 | 0 | 12.296 | 1.475 | 0.4004<br>0295 | 0.611 | -7.708  |
| <b>74472-33-6</b> | 2,3,3',6-<br>Tetrachlorobiphenyl              | Training   | 0.720  | 0.364  | -0.356 | -0.822 | 0.012 | 1 | 0 | 11.817 | 1.47  | 0.4119<br>6521 | 0.472 | -3.798  |
| <b>74472-34-7</b> | 2,3,4',5-<br>Tetrachlorobiphenyl              | Training   | 0.857  | 0.368  | -0.490 | -1.131 | 0.012 | 1 | 0 | 12.189 | 1.47  | 0.4065<br>8351 | 0.500 | -3.861  |
| <b>74472-36-9</b> | 2,3,3',5,6-<br>Pentachlorobiphenyl            | Training   | 0.477  | 0.444  | -0.034 | -0.077 | 0.012 | 1 | 0 | 11.685 | 1.522 | 0.4063<br>5927 | 0.528 | -3.299  |
| <b>74472-37-0</b> | 2,3,4,4',5-<br>Pentachlorobiphenyl            | Training   | 0.829  | 0.450  | -0.379 | -0.876 | 0.012 | 1 | 0 | 12.215 | 1.479 | 0.4009<br>7756 | 0.611 | -3.463  |
| <b>74472-38-1</b> | 2,3,4,4',6-<br>Pentachlorobiphenyl            | Prediction | 0.857  | 0.416  | -0.441 | -1.019 | 0.012 | 1 | 0 | 12.010 | 1.484 | 0.3976<br>2022 | 0.528 | -3.498  |
| <b>74472-42-7</b> | 2,3,3',4,4',6-<br>Hexachlorobiphenyl          | Training   | 0.826  | 0.592  | -0.234 | -0.542 | 0.013 | 1 | 0 | 12.047 | 1.574 | 0.3866<br>3257 | 0.694 | -4.509  |
| <b>74472-44-9</b> | 2,3,3',4',5,6-<br>Hexachlorobiphenyl          | Training   | 0.929  | 0.590  | -0.340 | -0.785 | 0.012 | 1 | 0 | 11.875 | 1.612 | 0.3846<br>082  | 0.639 | -4.415  |
| <b>74472-48-3</b> | 2,2',3,4,4',6,6'-<br>Heptachlorobiphenyl      | Training   | 0.928  | 0.701  | -0.227 | -0.525 | 0.014 | 1 | 0 | 11.669 | 1.636 | 0.3528<br>1119 | 0.694 | -5.714  |
| <b>74472-53-0</b> | 2,3,3',4,4',5,5',<br>6-<br>Octachlorobiphenyl | Training   | 0.806  | 0.795  | -0.011 | -0.026 | 0.019 | 1 | 0 | 11.962 | 1.635 | 0.3484<br>8099 | 0.861 | -5.041  |
| <b>74487-85-7</b> | 2,2',3,4',5,6,6'-<br>Heptachlorobiphenyl      | Prediction | 0.884  | 0.799  | -0.085 | -0.196 | 0.017 | 1 | 0 | 11.621 | 1.674 | 0.3514<br>973  | 0.806 | -5.618  |
| <b>779-02-2</b>   | 9-<br>Methylanthracene                        | Prediction | -2.398 | -1.759 | 0.639  | 1.489  | 0.030 | 0 | 0 | 18.248 | 1.237 | 0.4430<br>5556 | 0.236 | -4.039  |
| <b>781-17-9</b>   | 4,5,9,10-<br>Tetrahydropyrene                 | Training   | -1.553 | -1.039 | 0.514  | 1.210  | 0.050 | 0 | 0 | 9.124  | 1.223 | 0.3987<br>5    | 0.111 | -56.126 |

|                   |                                                                          |            |        |        |        |        |       |   |   |        |       |                |       |          |
|-------------------|--------------------------------------------------------------------------|------------|--------|--------|--------|--------|-------|---|---|--------|-------|----------------|-------|----------|
| <b>789-02-6</b>   | 1-Chloro-2-(2,2,2-Trichloro-1-(4-chlorophenyl)ethyl)benzene (o,p'-DDT)   | Training   | 0.839  | 0.805  | -0.033 | -0.078 | 0.025 | 1 | 0 | 5.819  | 1.448 | 0.3963<br>2259 | 0.569 | -4.992   |
| <b>81-15-2</b>    | Musk-xylene                                                              | Prediction | -0.210 | -0.799 | -0.589 | -1.525 | 0.213 | 0 | 3 | 4.638  | 0.882 | 0              | 1.618 | -6.160   |
| <b>81777-89-1</b> | Clomazone                                                                | Prediction | -3.699 | -0.893 | 2.806  | 6.662  | 0.065 | 1 | 4 | 3.099  | 1.238 | 0.4566<br>1226 | 0.476 | -3.035   |
| <b>821-95-4</b>   | 1-undecene                                                               | Training   | -1.409 | -1.201 | 0.208  | 0.489  | 0.049 | 0 | 0 | 1.152  | 0.167 | 0.3729<br>9195 | 0.056 | -41.173  |
| <b>83164-33-4</b> | Diflufenican                                                             | Training   | -2.991 | -3.083 | -0.092 | -0.226 | 0.126 | 0 | 7 | 6.296  | 2.563 | 0.8111<br>6504 | 0.972 | -12.309  |
| <b>832-69-9</b>   | 1-Methylphenanthrene                                                     | Training   | -1.721 | -1.711 | 0.011  | 0.025  | 0.029 | 0 | 0 | 18.216 | 1.237 | 0.4460<br>9375 | 0.299 | -6.643   |
| <b>84-15-1</b>    | o-Terphenyl                                                              | Prediction | -0.499 | -1.346 | -0.847 | -1.990 | 0.046 | 0 | 0 | 18.180 | 1.461 | 0.45           | 0.333 | -65.396  |
| <b>84632-59-7</b> | 3,6-Bis-(4-tert-butylphenyl)-2,5-dihydro-pyrrolo[3,4-c]pyrrole-1,4-dione | Training   | -1.413 | -1.530 | -0.116 | -0.291 | 0.161 | 0 | 6 | 7.163  | 2.449 | 0.4752<br>2555 | 1.654 | -107.949 |
| <b>85-01-8</b>    | Phenanthrene                                                             | Training   | -1.122 | -1.847 | -0.725 | -1.693 | 0.035 | 0 | 0 | 18.554 | 1.261 | 0.45           | 0.125 | -3.984   |
| <b>872-05-9</b>   | 1-decene                                                                 | Training   | -0.991 | -1.230 | -0.239 | -0.561 | 0.047 | 0 | 0 | 1.164  | 0.167 | 0.3750<br>5807 | 0.056 | -34.385  |
| <b>88671-89-0</b> | Myclobutanil                                                             | Training   | -2.097 | -1.561 | 0.536  | 1.282  | 0.079 | 1 | 6 | 4.618  | 1.975 | 0.7026<br>1728 | 0.684 | -7.169   |
| <b>91-17-8</b>    | t-decalin                                                                | Training   | -0.068 | -0.633 | -0.566 | -1.322 | 0.035 | 0 | 0 | 1.000  | 0.349 | 0              | 0.000 | -34.486  |
| <b>91-20-3</b>    | Naphthalene                                                              | Prediction | -2.301 | -1.530 | 0.771  | 1.800  | 0.034 | 0 | 0 | 10.721 | 0.919 | 0.45           | 0.000 | -34.486  |
| <b>91-57-6</b>    | 2-Methylnaphthalene                                                      | Training   | -2.000 | -1.600 | 0.400  | 0.932  | 0.028 | 0 | 0 | 10.744 | 0.895 | 0.4448<br>9796 | 0.083 | -3.391   |
| <b>92-06-8</b>    | m-terphenyl                                                              | Training   | -1.347 | -1.306 | 0.040  | 0.095  | 0.047 | 0 | 0 | 19.290 | 1.461 | 0.45           | 0.500 | -64.879  |
| <b>92-51-3</b>    | Bicyclohexyl                                                             | Training   | -0.770 | -0.503 | 0.266  | 0.620  | 0.030 | 0 | 0 | 1.000  | 0.349 | 0              | 0.139 | -44.916  |
| <b>933-12-0</b>   | 3,5,5-Trimethylcyclohexene                                               | Training   | -1.137 | -1.205 | -0.068 | -0.159 | 0.031 | 0 | 0 | 1.416  | 0.259 | 0.2694<br>4444 | 0.000 | -2.054   |



|                   |                                       |          |        |        |        |        |       |   |   |        |       |                |       |        |
|-------------------|---------------------------------------|----------|--------|--------|--------|--------|-------|---|---|--------|-------|----------------|-------|--------|
| <b>93-46-9</b>    | N,N'-Di-2-naphthyl-p-phenyleneDiamine | Training | -1.096 | -1.787 | -0.692 | -1.835 | 0.252 | 0 | 4 | 11.419 | 3.309 | 0.4934<br>0278 | 0.361 | 0.000  |
| <b>94361-06-5</b> | Cyproconazole                         | Training | -1.959 | -1.686 | 0.273  | 0.660  | 0.102 | 1 | 6 | 4.021  | 1.566 | 0.6952<br>7817 | 0.771 | -7.107 |
| <b>98-51-1</b>    | 1-tert butyl-4-methylbenzene          | Training | -1.018 | -1.133 | -0.115 | -0.270 | 0.040 | 0 | 0 | 3.323  | 0.45  | 0.3765<br>9722 | 0.354 | -1.549 |



**Table S5** – List of the molecules outside the Applicability Domain (AD) of equations 1 and 3. CAS numbers, SMILES, Structures, chemicals common names, and information on the AD.

| CAS         | SMILES                                                                  | Structure                                                                            | Common Name                  | out AD Eq.1 | out AD Eq.3 |
|-------------|-------------------------------------------------------------------------|--------------------------------------------------------------------------------------|------------------------------|-------------|-------------|
| 81-15-2     | <chem>O=N(=O)c1c(C)c(N(=O)=O)c(c1C(C)(C)C)N(=O)=O</chem>                | 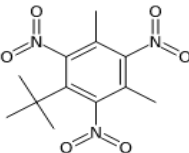   | Musk-xylene                  | X           | X           |
| 118-82-1    | <chem>CC(c1cc(Cc2cc(c(c2)C(C)(C)C)O)C(C)(C)C)cc(c1O)C(C)(C)C(C)C</chem> |    | Binox M                      | X           | X           |
| 120068-37-3 | <chem>N#Cc1nn(c(c1S(=O)C(F)(F)F)N)c1c(Cl)cc(cc1Cl)C(F)(F)F</chem>       |   | Fipronil                     | X           | X           |
| 541-02-6    | <chem>C[Si]1(C)O[Si](C)(C)O[Si](C)(C)O[Si](O[Si](O1)(C)C)(C)C</chem>    |  | Decamethylcyclopentasiloxane | X           | X           |
| 118-74-1    | <chem>Clc1c(Cl)c(Cl)c(c1Cl)Cl</chem>                                    |  | Hexachlorobenzene            | X           |             |

|            |                                                                             |                                                                                      |                                                                           |          |          |
|------------|-----------------------------------------------------------------------------|--------------------------------------------------------------------------------------|---------------------------------------------------------------------------|----------|----------|
| 123-48-8   | <chem>CC(=CC(C)(C)C)CC(C)(C)C</chem>                                        | 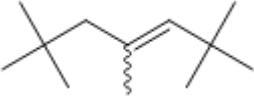   | 2,2,4,4,6,6 pentamethyl-3-heptene                                         | <b>X</b> |          |
| 1836-75-5  | <chem>Clc1ccc(c(c1)Cl)Oc1ccc(cc1)N(=O)=O</chem>                             |    | 2,4-Dichloro-1-(4-nitrophenoxy) benzene                                   | <b>X</b> |          |
| 4390-04-9  | <chem>CC(CC(CC(C)(C)C)(C)C)CC(C)(C)C</chem>                                 |    | 2,2,4,4,6,8,8-heptamethyl nonane                                          | <b>X</b> |          |
| 84632-59-7 | <chem>CC(c1ccc(cc1)c1[nH]c(=O)c2c1c(=O)[nH]c2c1ccc(cc1)C(C)(C)C)(C)C</chem> |  | 3,6-Bis-(4-tert-butyl-phenyl)-2,5-dihydro-pyrrolo[3,4-c]pyrrole-1,4-dione |          | <b>X</b> |

|             |                                                                |                                                                                      |                                       |  |   |
|-------------|----------------------------------------------------------------|--------------------------------------------------------------------------------------|---------------------------------------|--|---|
| 112281-77-3 | <chem>Clc1ccc(c(c1)Cl)C(Cn1cncn1)C(F)(F)F</chem>               | 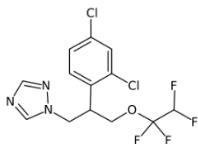   | Tetraconazole                         |  | X |
| 43121-43-3  | <chem>O=C(C(C)(C)C)C(n1ncnc1)Oc1ccc(cc1)Cl</chem>              |    | Triadimefon                           |  | X |
| 93-46-9     | <chem>c1ccc2c(c1)cc(cc2)Nc1ccc(cc1)Nc1ccc2c(c1)cccc2</chem>    |    | N,N'-Di-2-naphthyl-p-phenyleneDiamine |  | X |
| 83164-33-4  | <chem>Fc1ccc(c(c1)F)NC(=O)c1cccn(c1)Oc1cccc(c1)C(F)(F)F</chem> |   | Diflufenican                          |  | X |
| 16958-92-2  | <chem>CCCCCCCCCCCCCCCCOC(=O)CCCCC(=O)OCCCCCCCCCCCCC</chem>     |  | Diisotridecyl adipate                 |  | X |
